# Supplementary material for: Different Gabapentin and Pregabalin Dosages for Perioperative Pain Control in Patients Undergoing Spine Surgery: A Systematic Review and Network Meta-Analysis
Source: PubMed Central journal article supplement (PMC10413173; doi:10.1001/jamanetworkopen.2023.28121), 2023-08-09
Supplement: jamanetwopen-e2328121-s001.pdf [file jamanetwopen-e2328121-s001.pdf]

## Supplemental Online Content

Tsai SHL, Hu CW, El Sammak S, et al. Different gabapentin and pregabalin dosages for perioperative pain control in patients undergoing spine surgery: a systematic review and network meta-analysis. *JAMA Netw Open*. 2023;6(8):e2328121. doi:10.1001/jamanetworkopen.2023.28121

- eFigure 1.** Network Graph for Vomit and Dizziness
- eFigure 2.** Risk of Bias Assessment of the Included Studies
- eFigure 3.** Network Meta-Analysis League Tables
- eFigure 4.** Rank Plot
- eFigure 5.** Forest Plot of Network Meta-Analysis Results (Placebo as Reference)
- eFigure 6.** Forest Plot of Pairwise Comparison for Each Outcome
- eFigure 7.** Publication Bias: Funnel Plot
- eFigure 8.** Publication Bias: The Egger Test
- eFigure 9.** CINeMA for the Perioperative Outcomes (VAS, Opioid Consumption, Nausea, Vomit, Dizziness)
- eTable 1.** Electronic Database Search Strategy
- eTable 2.** Excluded Studies With Reasons
- eTable 3.** Descriptions and Demo of the Included Studies
- eTable 4.** Assessment of Inconsistency With Design-by-Treatment Interaction Models
- eTable 5.** Meta-Regression of Covariates for Outcomes
- eTable 6.** SUCRA, PrBest, and Mean Rank of Different Dosages of Gabapentin and Pregabalin for Patients Undergoing Spinal Surgery
- eFigure 10.** Network Graph for Nausea Without Funding
- eFigure 11.** Network Meta-Analysis League Tables for Nausea Without Funding
- eFigure 12.** Rank Plot for Nausea Without Funding
- eFigure 13.** Forest Plot of Network Meta-Analysis Results for Nausea Without Funding (Placebo as Reference)
- eFigure 14.** Forest Plot of Pairwise Comparison for Nausea Without Funding
- eFigure 15.** Publication Bias: Funnel Plot for Nausea Without Funding
- eFigure 16.** Publication Bias: The Egger Test for Nausea Without Funding
- eFigure 17.** CINeMA for Nausea Without Funding
- eTable 7.** SUCRA, PrBest, and Mean Rank of Different Dosages of Gabapentin and Pregabalin for Patients Undergoing Spinal Surgery
- eTable 8.** Assessment of Inconsistency With Design-by-Treatment Interaction Models
- eReferences**

This supplemental material has been provided by the authors to give readers additional information about their work.

**eFigure 1:** Network Graph for Vomit and Dizziness

\* The sizes of the nodes are proportional to the included cases randomized to the treatments, and the number on the lines indicate the number of studies comparing two nodes.

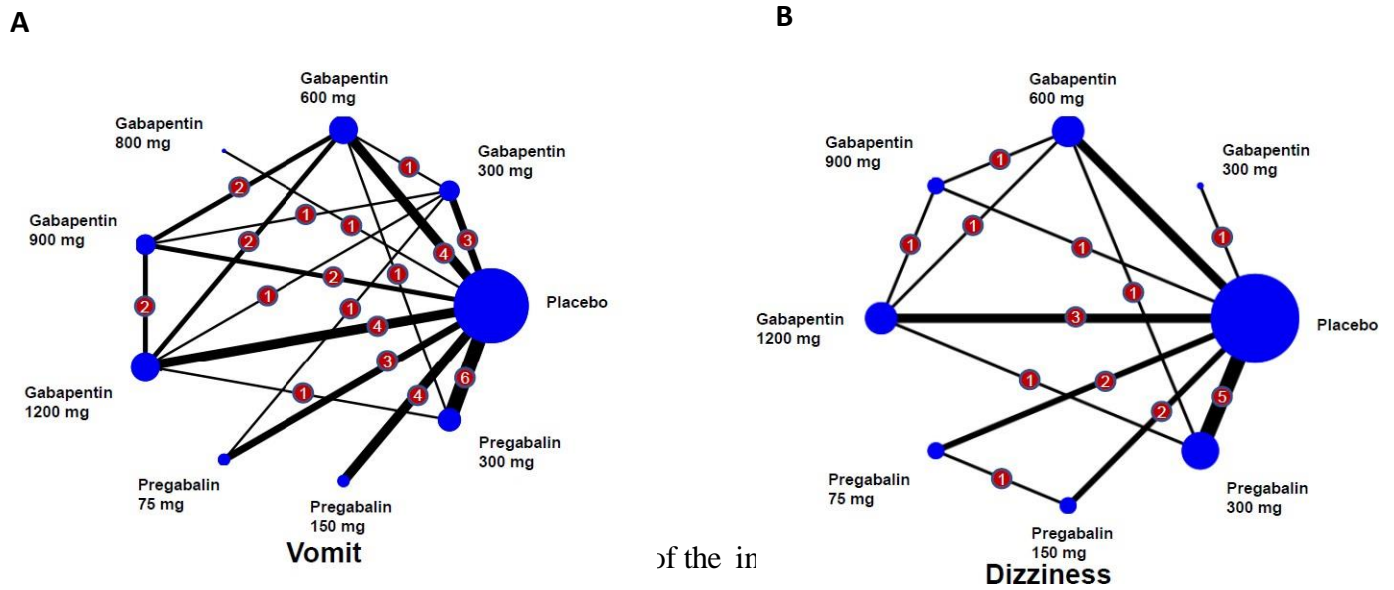

**eFigure 2** Risk of Bias Assessment of the Included Studies

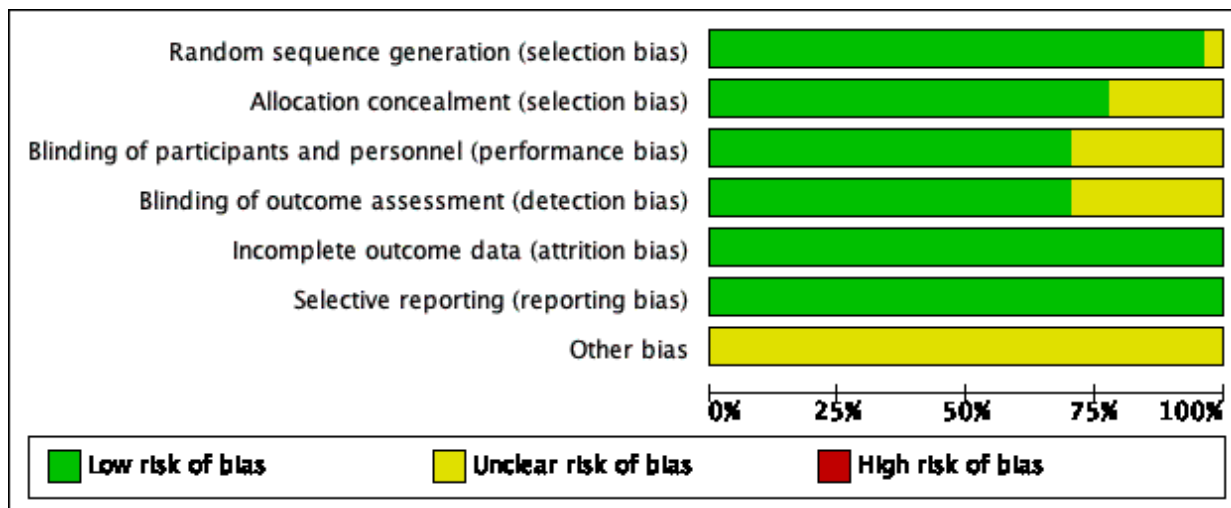

|                    | Random sequence generation (selection bias) | Allocation concealment (selection bias) | Blinding of participants and personnel (performance bias) | Blinding of outcome assessment (detection bias) | Incomplete outcome data (attrition bias) | Selective reporting (reporting bias) | Other bias |
|--------------------|---------------------------------------------|-----------------------------------------|-----------------------------------------------------------|-------------------------------------------------|------------------------------------------|--------------------------------------|------------|
| Altiparmak 2018    | +                                           | +                                       | +                                                         | +                                               | +                                        | +                                    | ?          |
| Bala 2019          | +                                           | +                                       | ?                                                         | ?                                               | +                                        | +                                    | ?          |
| Baloch 2021        | ?                                           | +                                       | +                                                         | +                                               | +                                        | +                                    | ?          |
| Burke 2010         | +                                           | +                                       | +                                                         | ?                                               | +                                        | +                                    | ?          |
| Choi 2013          | +                                           | +                                       | +                                                         | +                                               | +                                        | +                                    | ?          |
| Gianesello 2012    | +                                           | +                                       | +                                                         | +                                               | +                                        | +                                    | ?          |
| Hegarty 2011       | +                                           | +                                       | +                                                         | +                                               | +                                        | +                                    | ?          |
| Khan 2011          | +                                           | ?                                       | +                                                         | +                                               | +                                        | +                                    | ?          |
| Khurana 2014       | +                                           | +                                       | ?                                                         | +                                               | +                                        | +                                    | ?          |
| Kien 2019          | +                                           | +                                       | ?                                                         | ?                                               | +                                        | +                                    | ?          |
| Kim 2011           | +                                           | +                                       | +                                                         | +                                               | +                                        | +                                    | ?          |
| Kumar 2013         | +                                           | +                                       | +                                                         | +                                               | +                                        | +                                    | ?          |
| Momon 2019         | +                                           | +                                       | +                                                         | +                                               | +                                        | +                                    | ?          |
| Ozgencl 2011       | +                                           | +                                       | ?                                                         | ?                                               | +                                        | +                                    | ?          |
| Pandey 2004        | +                                           | +                                       | +                                                         | +                                               | +                                        | +                                    | ?          |
| Pandey 2005        | +                                           | ?                                       | +                                                         | +                                               | +                                        | +                                    | ?          |
| Qadeer 2017        | +                                           | +                                       | ?                                                         | ?                                               | +                                        | +                                    | ?          |
| Radhakrishnan 2005 | +                                           | +                                       | +                                                         | +                                               | +                                        | +                                    | ?          |
| Raja 2019          | +                                           | +                                       | ?                                                         | ?                                               | +                                        | +                                    | ?          |
| Routray 2018       | +                                           | +                                       | ?                                                         | ?                                               | +                                        | +                                    | ?          |
| Spreng 2011        | +                                           | ?                                       | +                                                         | ?                                               | +                                        | +                                    | ?          |
| Turan 2004         | +                                           | +                                       | +                                                         | +                                               | +                                        | +                                    | ?          |
| Urban 2018         | +                                           | ?                                       | +                                                         | +                                               | +                                        | +                                    | ?          |
| Vasigh 2016        | +                                           | +                                       | +                                                         | +                                               | +                                        | +                                    | ?          |
| Yadav 2018         | +                                           | ?                                       | +                                                         | +                                               | +                                        | +                                    | ?          |
| Zarei 2016         | +                                           | ?                                       | +                                                         | +                                               | +                                        | +                                    | ?          |
| Zhang 2021         | +                                           | +                                       | ?                                                         | ?                                               | +                                        | +                                    | ?          |

**eFigure 3: Network Meta-Analysis League Tables**

(Comparisons between treatments (column vs row) should be read from left to right and the order of the treatments in the diagonal doesn't reflect ranking)

(\*: Significant difference)

**A:** Network meta-analysis league tables for postoperative pain intensity (VAS)  
 (In the left lower half, mean differences lower than 0 favor the row-defining treatment)

|                      |                       |                       |                       |                      |                        |                        |                      |                      |                     |  |
|----------------------|-----------------------|-----------------------|-----------------------|----------------------|------------------------|------------------------|----------------------|----------------------|---------------------|--|
| Placebo              |                       |                       |                       |                      |                        |                        |                      |                      |                     |  |
| *1.64<br>(0.42,2.86) | Gabapentin<br>300mg   |                       |                       |                      |                        |                        |                      |                      |                     |  |
| 0.94<br>(-0.90,2.78) | -0.70<br>(-2.91,1.50) | Gabapentin<br>400mg   |                       |                      |                        |                        |                      |                      |                     |  |
| *2.11<br>(1.12,3.10) | 0.47<br>(-0.93,1.87)  | 1.17<br>(-0.91,3.26)  | Gabapentin<br>600mg   |                      |                        |                        |                      |                      |                     |  |
| 0.00<br>(-3.27,3.27) | -1.64<br>(-5.14,1.85) | -0.94<br>(-4.69,2.82) | -2.11<br>(-5.53,1.31) | Gabapentin<br>800mg  |                        |                        |                      |                      |                     |  |
| *2.67<br>(1.54,3.80) | 1.03<br>(-0.41,2.47)  | 1.74<br>(-0.42,3.89)  | 0.56<br>(-0.66,1.79)  | 2.67<br>(-0.79,6.14) | Gabapentin<br>900mg    |                        |                      |                      |                     |  |
| *2.49<br>(1.58,3.39) | 0.84<br>(-0.51,2.20)  | 1.55<br>(-0.50,3.60)  | 0.38<br>(-0.75,1.50)  | 2.49<br>(-0.91,5.88) | -0.19<br>(-1.37,1.00)  | Gabapentin<br>1200mg   |                      |                      |                     |  |
| 0.94<br>(-0.05,1.93) | -0.70<br>(-2.27,0.87) | 0.00<br>(-2.05,2.05)  | -1.17<br>(-2.57,0.23) | 0.94<br>(-2.48,4.36) | -1.73<br>(-3.24,-0.23) | -1.55<br>(-2.89,-0.21) | Pregabalin<br>75mg   |                      |                     |  |
| *1.31<br>(0.6,1.99)  | -0.33<br>(-1.73,1.07) | 0.37<br>(-1.34,2.08)  | -0.80<br>(-2.00,0.40) | 1.31<br>(-2.04,4.65) | -1.37<br>(-2.69,-0.04) | -1.18<br>(-2.31,-0.05) | 0.37<br>(-0.77,1.50) | Pregabalin<br>150mg  |                     |  |
| *1.41<br>(0.41,2.41) | -0.23<br>(-1.78,1.31) | 0.47<br>(-1.62,2.56)  | -0.70<br>(-2.06,0.66) | 1.41<br>(-2.01,4.83) | -1.26<br>(-2.72,0.19)  | -1.08<br>(-2.28,0.13)  | 0.47<br>(-0.93,1.88) | 0.10<br>(-1.10,1.31) | Pregabalin<br>300mg |  |

**B: Network meta-analytic relative treatment effects for opioid consumption**  
(In the left lower half, mean differences lower than 0 favor the row-defining treatment)

|                            |                             |                             |                             |                             |                              |                            |                             |                             |
|----------------------------|-----------------------------|-----------------------------|-----------------------------|-----------------------------|------------------------------|----------------------------|-----------------------------|-----------------------------|
| <b>Placebo</b>             |                             |                             |                             |                             |                              |                            |                             |                             |
| -4.24<br>(-15.87,7.40)     | <b>Gabapentin<br/>300mg</b> |                             |                             |                             |                              |                            |                             |                             |
| *-15.25<br>(-23.48,-7.02)  | -11.01<br>(-23.93,1.91)     | <b>Gabapentin<br/>600mg</b> |                             |                             |                              |                            |                             |                             |
| 0.40<br>(-17.56,18.36)     | 4.64<br>(-16.76,26.03)      | 15.65<br>(-4.11,35.41)      | <b>Gabapentin<br/>800mg</b> |                             |                              |                            |                             |                             |
| *-22.07<br>(-33.22,-10.92) | *-17.83<br>(-32.11,-3.56)   | -6.82<br>(-18.44,4.80)      | *-22.47<br>(-43.61,-1.33)   | <b>Gabapentin<br/>900mg</b> |                              |                            |                             |                             |
| *-20.36<br>(-28.80,-11.93) | *-16.13<br>(-29.18,-3.08)   | -5.12<br>(-15.13,4.90)      | *-20.76<br>(-40.61,-0.92)   | 1.70<br>(-10.02,13.43)      | <b>Gabapentin<br/>1200mg</b> |                            |                             |                             |
| -1.92<br>(-19.27,15.43)    | 2.32<br>(-18.57,23.20)      | 13.33<br>(-5.87,32.53)      | -2.32<br>(-27.29,22.65)     | 20.15<br>(-0.47,40.77)      | 18.44<br>(-0.85,37.73)       | <b>Pregabalin<br/>75mg</b> |                             |                             |
| *-9.33<br>(-17.90,-0.75)   | -5.09<br>(-19.47,9.28)      | 5.92<br>(-5.77,17.61)       | -9.73<br>(-29.63,10.17)     | 12.74<br>(-1.19,26.67)      | 11.04<br>(-0.79,22.87)       | -7.41<br>(-26.76,11.94)    | <b>Pregabalin<br/>150mg</b> |                             |
| *-13.60<br>(-21.74,-5.47)  | -9.37<br>(-23.21,4.47)      | 1.64<br>(-8.84,12.12)       | -14.00<br>(-33.72,5.71)     | 8.46<br>(-4.76,21.68)       | 6.76<br>(-3.88,17.40)        | -11.68<br>(-30.85,7.48)    | -4.28<br>(-15.19,6.63)      | <b>Pregabalin<br/>300mg</b> |

**C: Network meta-analytic relative treatment effects for Nausea**  
(In the left lower half, odds ratio lower than 1 favor the row-defining treatment)

|                      |                             |                             |                             |                             |                              |                            |                             |                             |
|----------------------|-----------------------------|-----------------------------|-----------------------------|-----------------------------|------------------------------|----------------------------|-----------------------------|-----------------------------|
| <b>Placebo</b>       |                             |                             |                             |                             |                              |                            |                             |                             |
| 0.57<br>(0.17,1.85)  | <b>Gabapentin<br/>300mg</b> |                             |                             |                             |                              |                            |                             |                             |
| 0.57<br>(0.23,1.41)  | 1.01<br>(0.24,4.31)         | <b>Gabapentin<br/>600mg</b> |                             |                             |                              |                            |                             |                             |
| 1.00<br>(0.22,4.63)  | 1.76<br>(0.25,12.19)        | 1.74<br>(0.29,10.27)        | <b>Gabapentin<br/>800mg</b> |                             |                              |                            |                             |                             |
| 0.66<br>(0.16,2.72)  | 1.16<br>(0.19,6.97)         | 1.15<br>(0.27,4.90)         | 0.66<br>(0.08,5.31)         | <b>Gabapentin<br/>900mg</b> |                              |                            |                             |                             |
| 0.95<br>(0.41,2.19)  | 1.68<br>(0.41,6.85)         | 1.66<br>(0.55,4.98)         | 0.95<br>(0.17,5.46)         | 1.45<br>(0.33,6.30)         | <b>Gabapentin<br/>1200mg</b> |                            |                             |                             |
| 0.88<br>(0.39,2.00)  | 1.55<br>(0.42,5.70)         | 1.53<br>(0.47,5.05)         | 0.88<br>(0.15,5.02)         | 1.34<br>(0.26,6.76)         | 0.92<br>(0.29,2.95)          | <b>Pregabalin<br/>75mg</b> |                             |                             |
| *0.41<br>(0.17,0.98) | 0.72<br>(0.17,3.09)         | 0.71<br>(0.20,2.47)         | 0.41<br>(0.07,2.39)         | 0.62<br>(0.12,3.26)         | 0.43<br>(0.13,1.43)          | 0.46<br>(0.15,1.46)        | <b>Pregabalin<br/>150mg</b> |                             |
| 0.57<br>(0.27,1.21)  | 1.01<br>(0.25,4.05)         | 0.99<br>(0.33,2.99)         | 0.57<br>(0.10,3.16)         | 0.87<br>(0.18,4.14)         | 0.60<br>(0.22,1.65)          | 0.65<br>(0.21,1.98)        | 1.40<br>(0.44,4.47)         | <b>Pregabalin<br/>300mg</b> |

**D:** Network meta-analytic relative treatment effects for Vomit  
(In the left lower half, odds ratio lower than 1 favor the row-defining treatment)

|                      |                     |                      |                     |                      |                      |                     |                     |                     |
|----------------------|---------------------|----------------------|---------------------|----------------------|----------------------|---------------------|---------------------|---------------------|
| Placebo              |                     |                      |                     |                      |                      |                     |                     |                     |
| 0.87<br>(0.32,2.41)  | Gabapentin<br>300mg |                      |                     |                      |                      |                     |                     |                     |
| *0.47<br>(0.22,0.99) | 0.53<br>(0.16,1.76) | Gabapentin<br>600mg  |                     |                      |                      |                     |                     |                     |
| 0.64<br>(0.10,4.15)  | 0.74<br>(0.09,6.15) | 1.38<br>(0.18,10.30) | Gabapentin<br>800mg |                      |                      |                     |                     |                     |
| 0.35<br>(0.07,1.73)  | 0.40<br>(0.07,2.39) | 0.74<br>(0.15,3.78)  | 0.54<br>(0.05,6.33) | Gabapentin<br>900mg  |                      |                     |                     |                     |
| 0.45<br>(0.18,1.13)  | 0.51<br>(0.14,1.86) | 0.96<br>(0.33,2.83)  | 0.70<br>(0.09,5.61) | 1.30<br>(0.24,7.08)  | Gabapentin<br>1200mg |                     |                     |                     |
| 0.58<br>(0.22,1.52)  | 0.66<br>(0.17,2.61) | 1.24<br>(0.37,4.20)  | 0.90<br>(0.11,7.35) | 1.67<br>(0.26,10.83) | 1.29<br>(0.34,4.87)  | Pregabalin<br>75mg  |                     |                     |
| 0.39<br>(0.14,1.11)  | 0.44<br>(0.10,1.91) | 0.83<br>(0.23,3.02)  | 0.60<br>(0.07,5.12) | 1.12<br>(0.16,7.62)  | 0.86<br>(0.21,3.48)  | 0.67<br>(0.16,2.78) | Pregabalin<br>150mg |                     |
| 0.57<br>(0.30,1.10)  | 0.65<br>(0.20,2.15) | 1.22<br>(0.49,3.07)  | 0.89<br>(0.12,6.41) | 1.65<br>(0.30,9.06)  | 1.27<br>(0.44,3.64)  | 0.99<br>(0.31,3.15) | 1.47<br>(0.43,5.09) | Pregabalin<br>300mg |

**E:** Network meta-analytic relative treatment effects for Dizziness  
(In the left lower half, odds ratio lower than 1 favor the row-defining treatment)

|                     |                             |                             |                             |                              |                            |                             |                             |
|---------------------|-----------------------------|-----------------------------|-----------------------------|------------------------------|----------------------------|-----------------------------|-----------------------------|
| <b>Placebo</b>      |                             |                             |                             |                              |                            |                             |                             |
| 0.32<br>(0.01,8.24) | <b>Gabapentin<br/>300mg</b> |                             |                             |                              |                            |                             |                             |
| 1.52<br>(0.70,3.30) | 4.72<br>(0.17,132.59)       | <b>Gabapentin<br/>600mg</b> |                             |                              |                            |                             |                             |
| 1.17<br>(0.17,8.31) | 3.65<br>(0.08,161.20)       | 0.77<br>(0.10,6.05)         | <b>Gabapentin<br/>900mg</b> |                              |                            |                             |                             |
| 1.66<br>(0.77,3.62) | 5.17<br>(0.18,145.26)       | 1.10<br>(0.38,3.13)         | 1.42<br>(0.20,9.88)         | <b>Gabapentin<br/>1200mg</b> |                            |                             |                             |
| 1.95<br>(0.43,8.86) | 6.05<br>(0.17,217.05)       | 1.28<br>(0.23,7.04)         | 1.66<br>(0.14,19.72)        | 1.17<br>(0.21,6.42)          | <b>Pregabalin<br/>75mg</b> |                             |                             |
| 0.85<br>(0.21,3.42) | 2.66<br>(0.08,90.42)        | 0.56<br>(0.11,2.76)         | 0.73<br>(0.07,8.02)         | 0.51<br>(0.10,2.51)          | 0.44<br>(0.09,2.13)        | <b>Pregabalin<br/>150mg</b> |                             |
| 1.12<br>(0.57,2.19) | 3.48<br>(0.13,95.59)        | 0.74<br>(0.29,1.88)         | 0.96<br>(0.13,7.24)         | 0.67<br>(0.28,1.61)          | 0.58<br>(0.11,3.02)        | 1.31<br>(0.28,6.11)         | <b>Pregabalin<br/>300mg</b> |



**eFigure 4: Rank Plot**

**A: VAS**

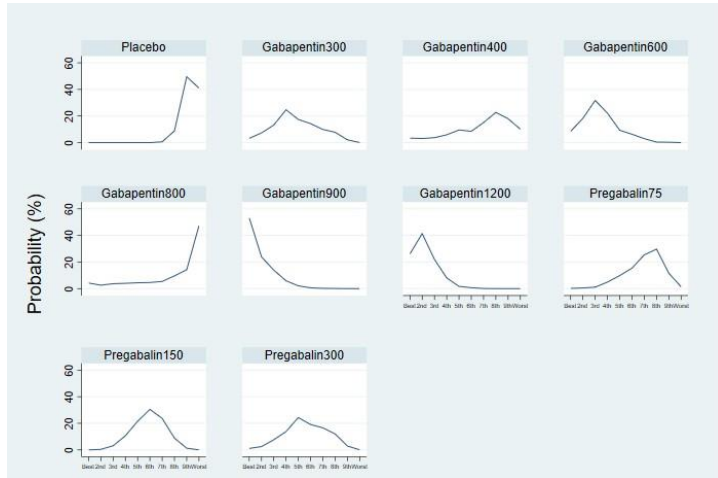

**B: Opioid consumption**

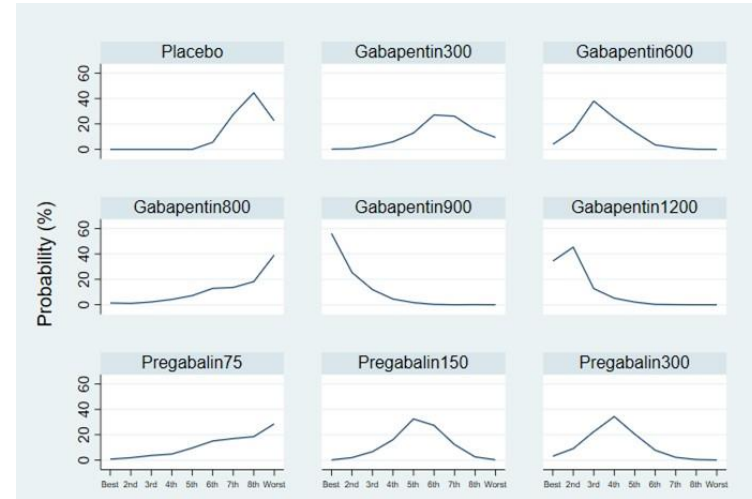

**C: Nausea**

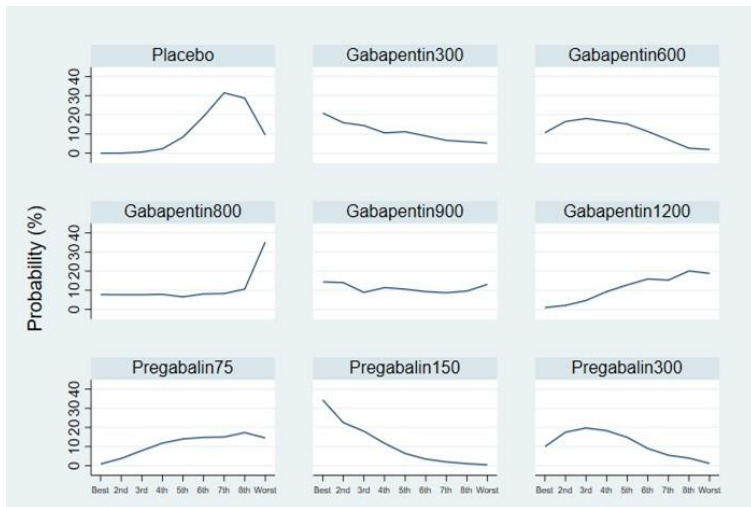

**D: Vomit**

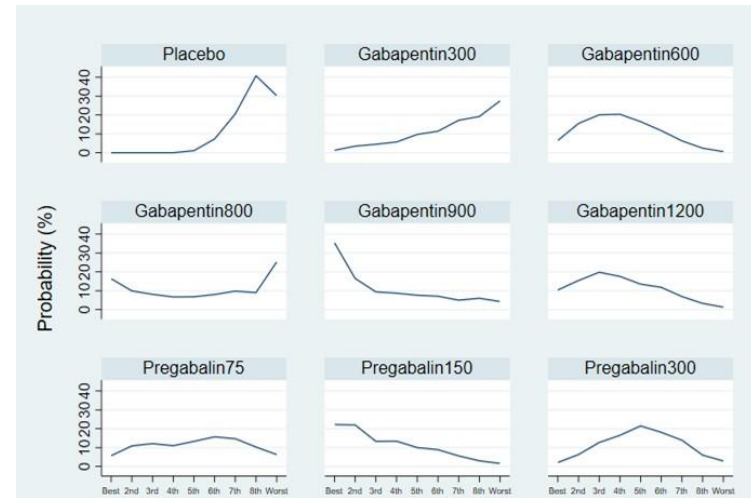

## E: Dizziness

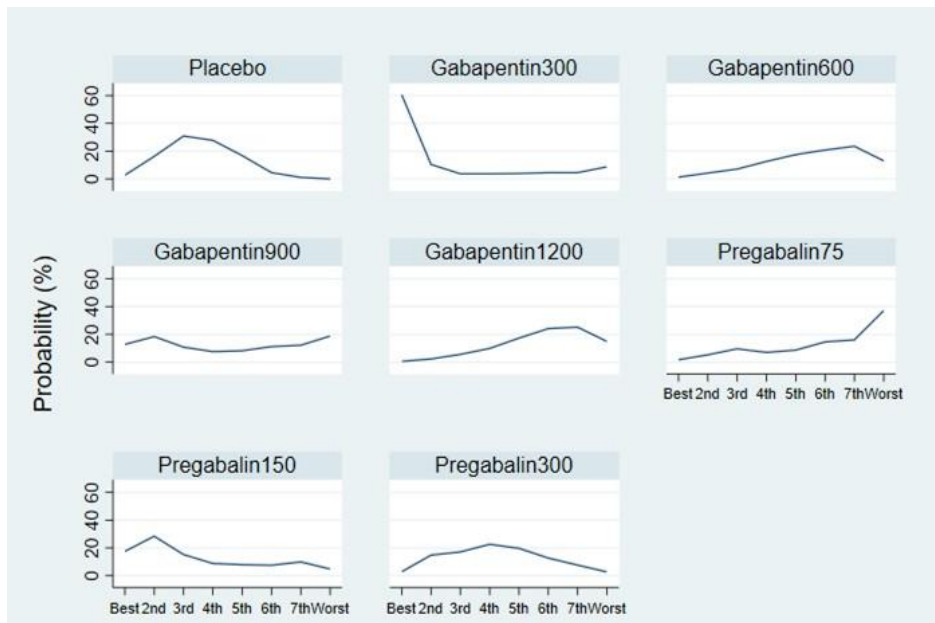

**eFigure 5: Forest Plot of Network Meta-Analysis Results (Placebo as Reference)**

**A: VAS**

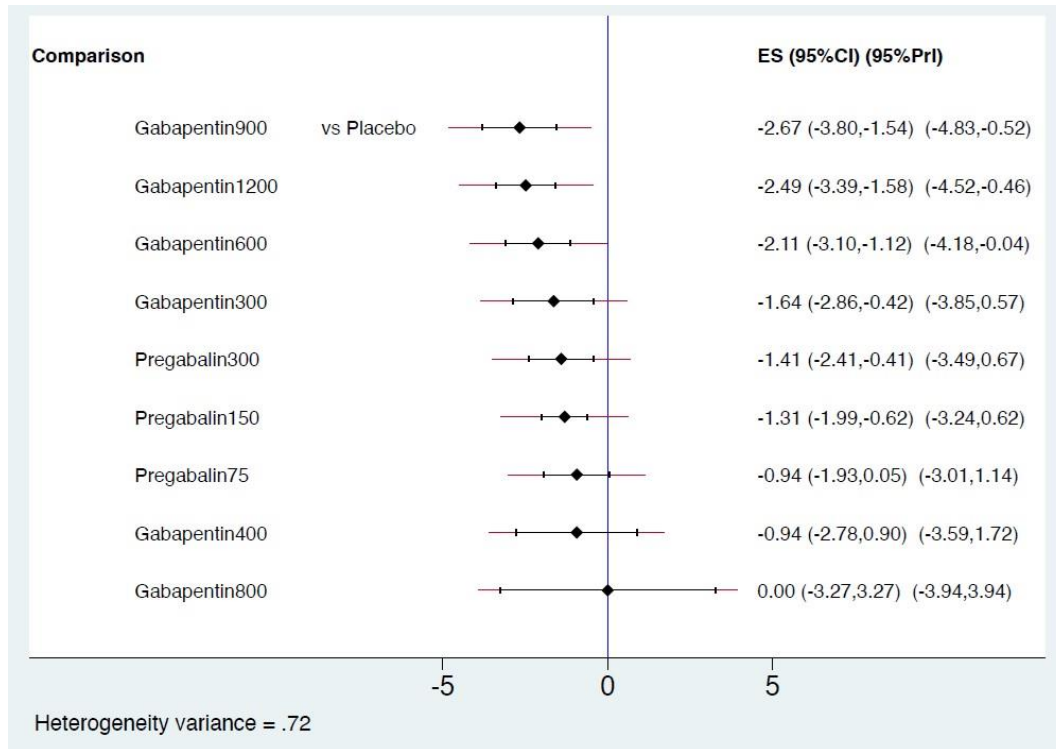

**B: Opioid consumption**

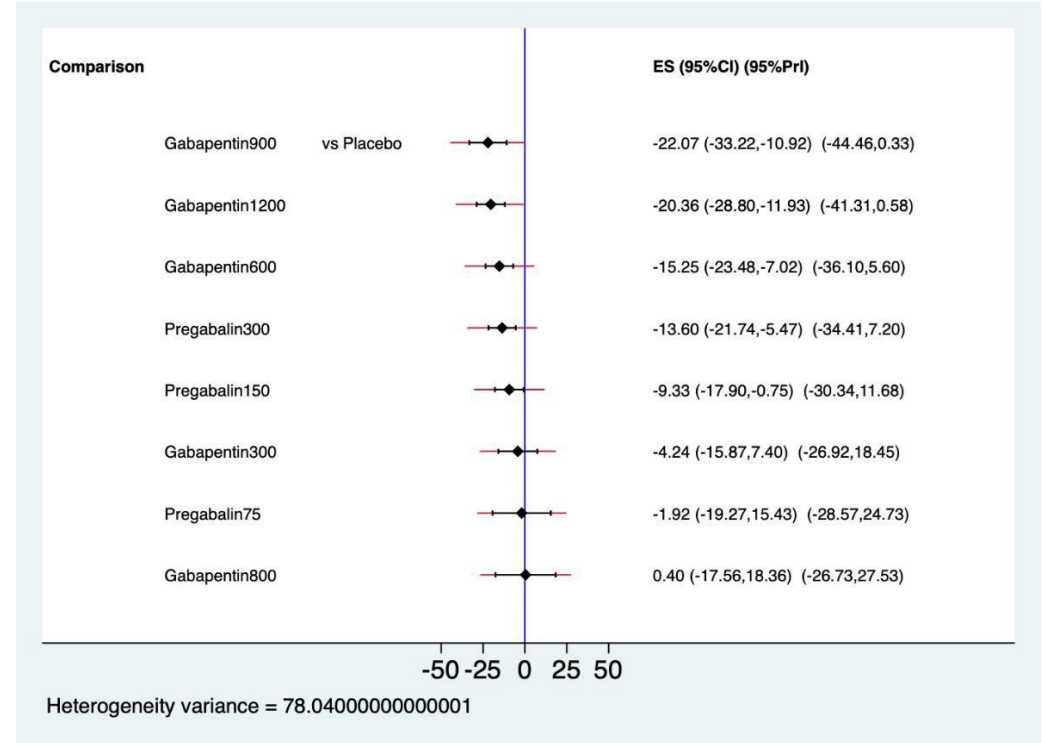

### C: Nausea

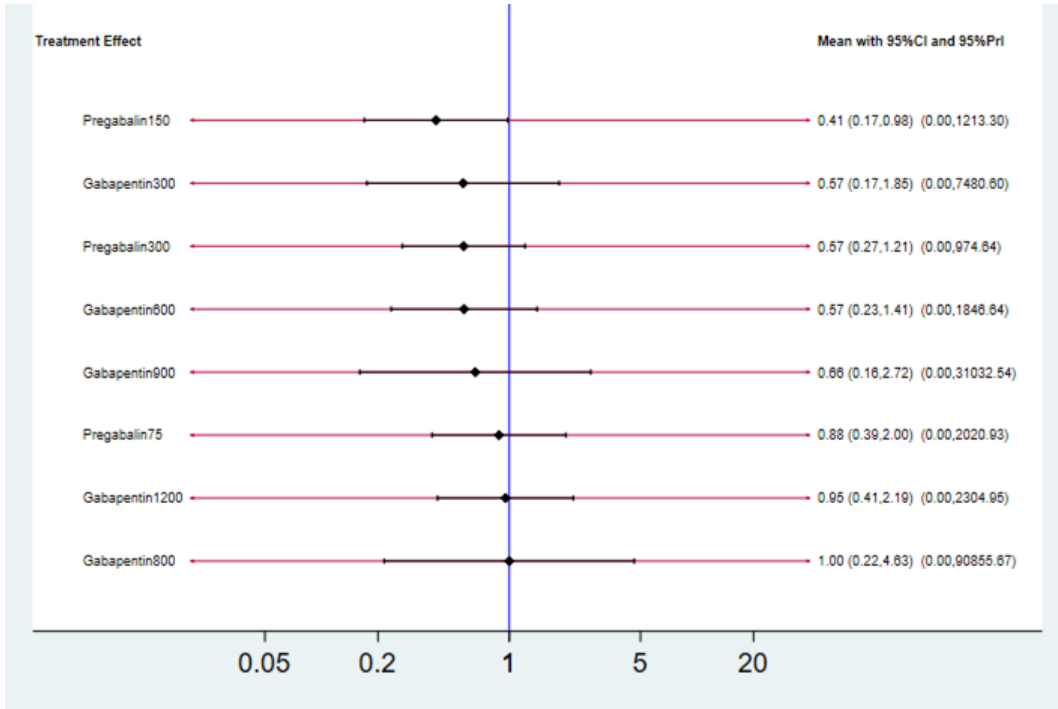

### D: Vomit

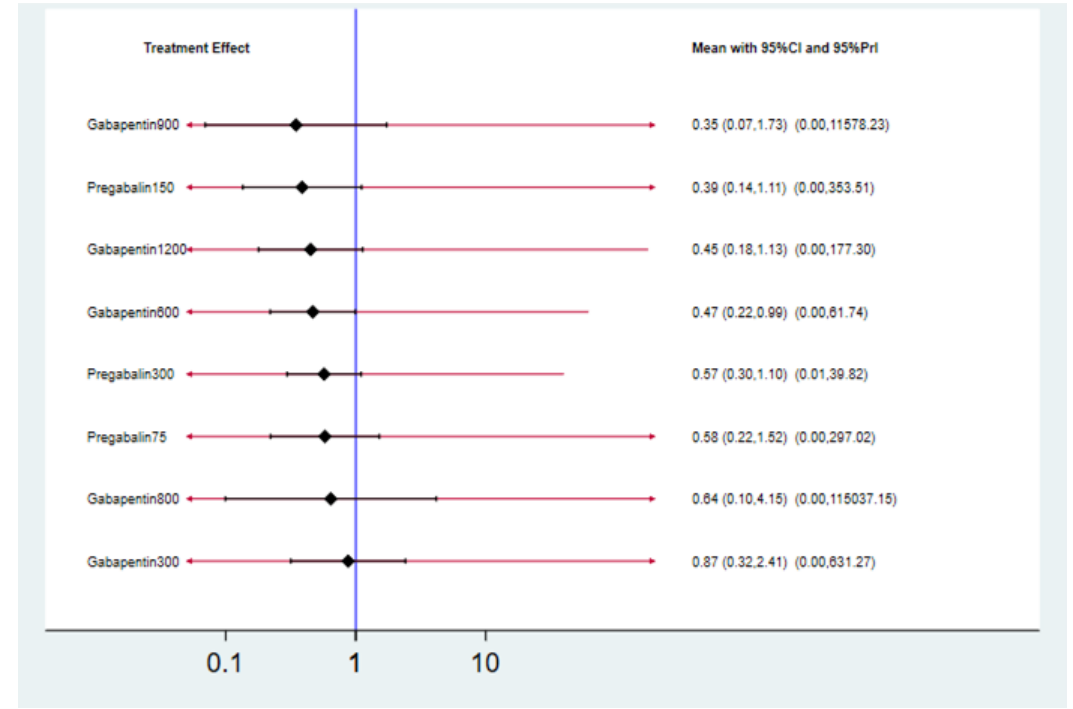

## E: Dizziness

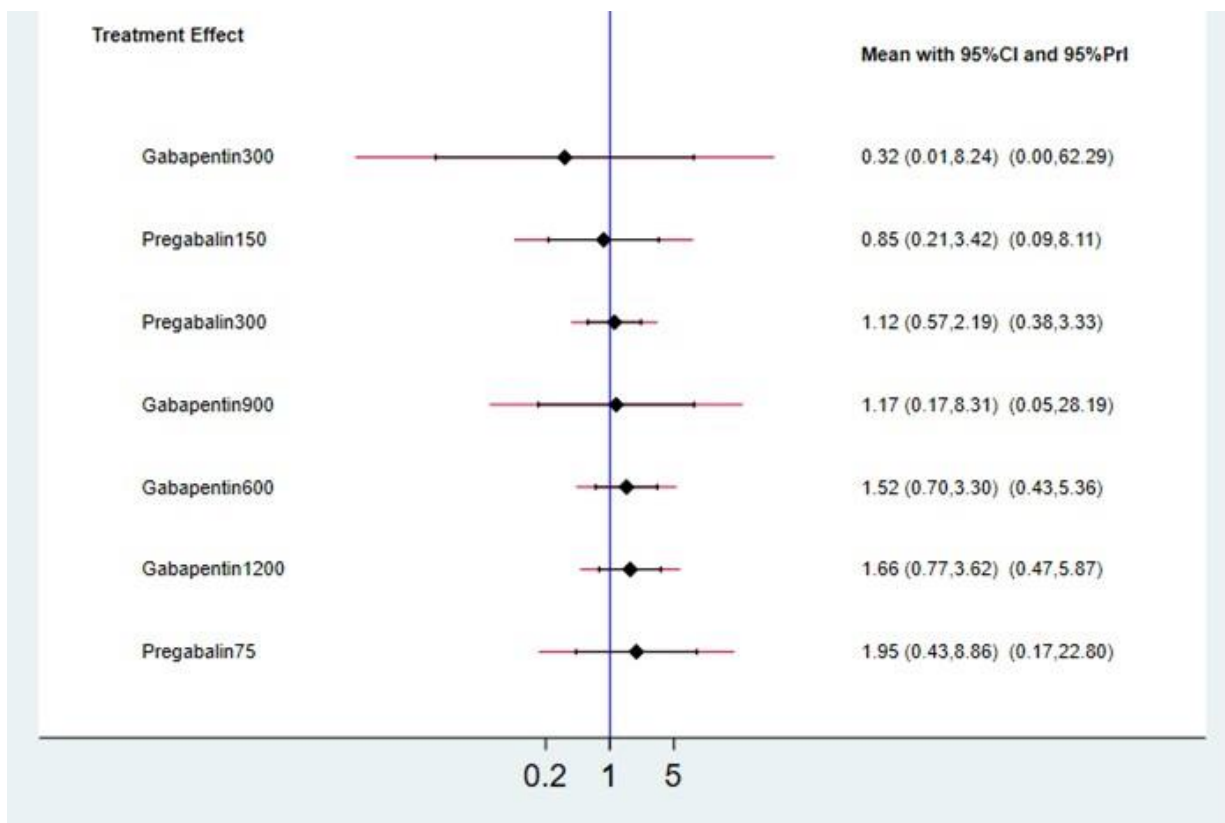

**eFigure 6:** Forest Plot of Pairwise Comparison for Each Outcome

**eFigure 6a:** VAS: (A: placebo, B: Gabapentin 300mg, C: Gabapentin 400mg, D: Gabapentin 600 mg, E: Gabapentin 800mg, F: Gabapentin 900mg, G: Gabapentin 1200mg, H: pregabalin 75mg, I: pregabalin 150mg J: pregabalin 300mg)

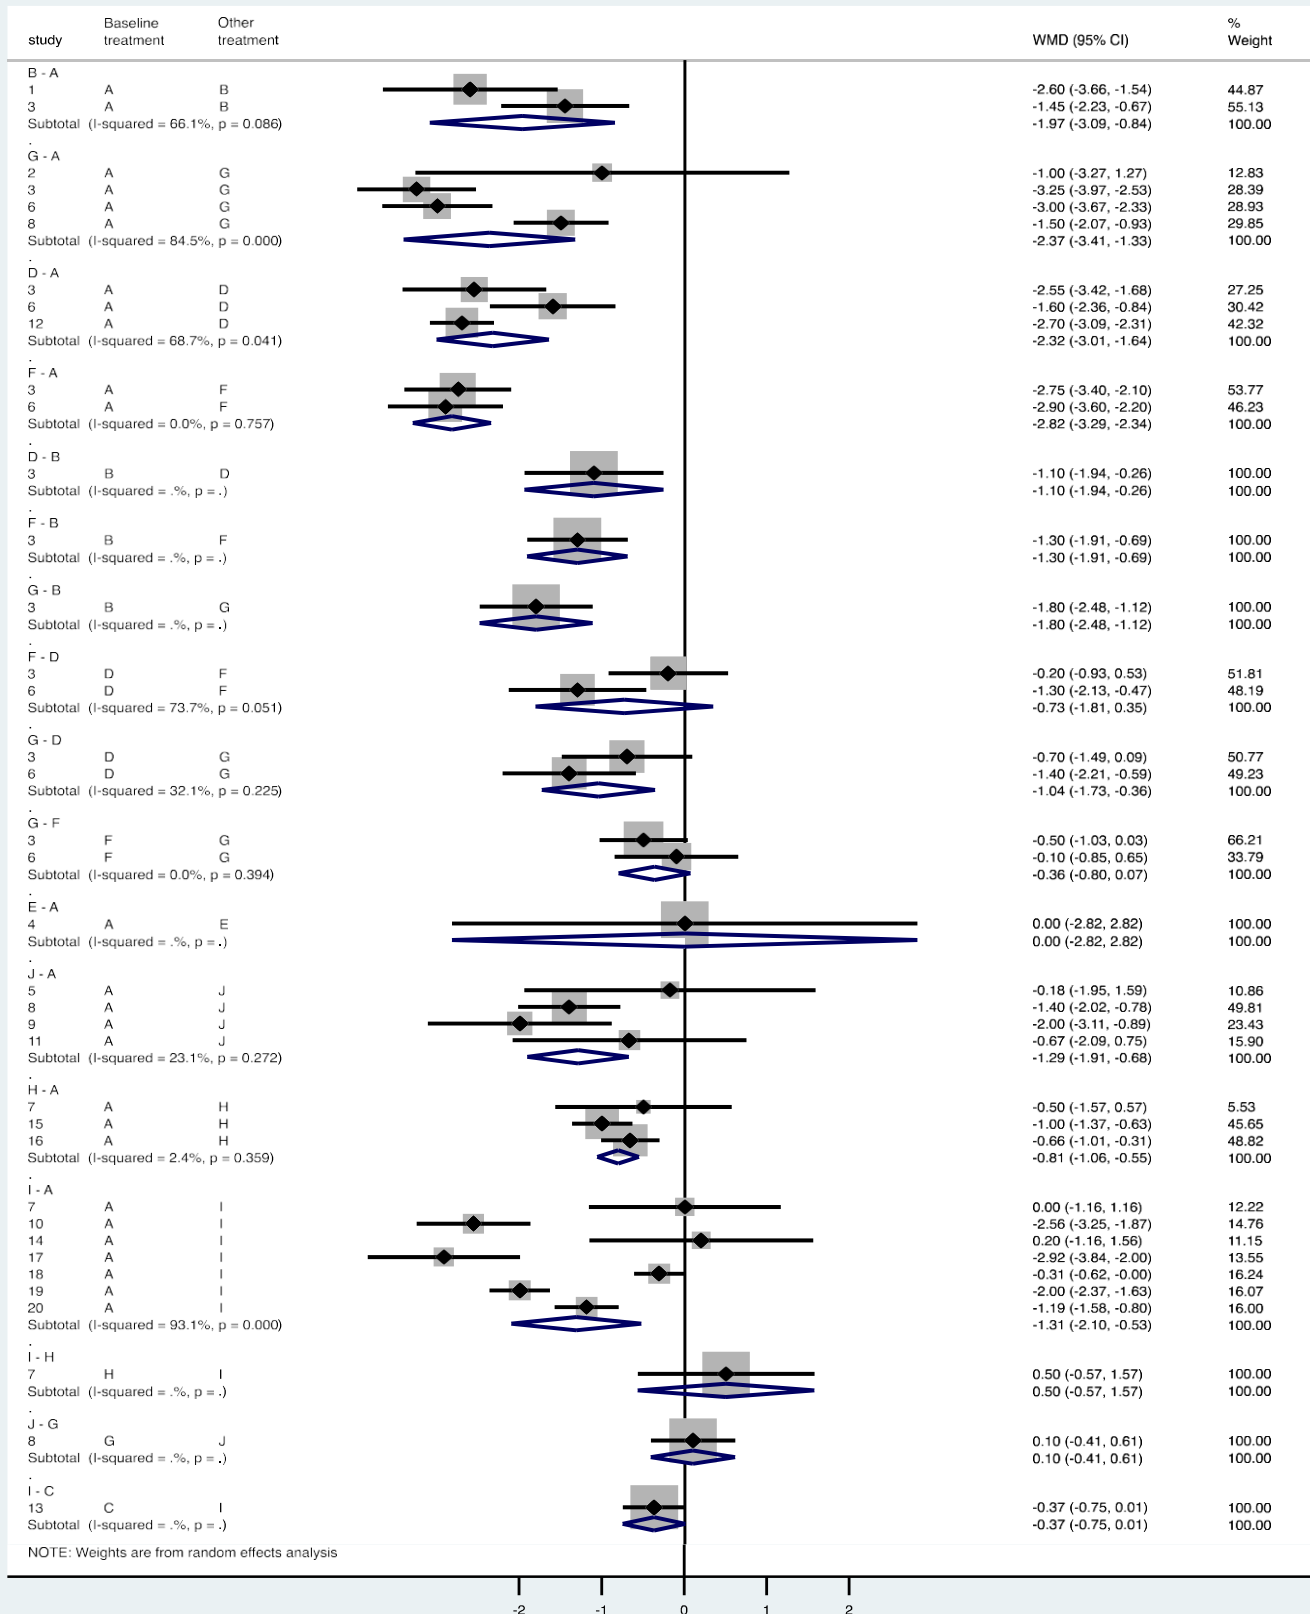

**eFigure 6b: Opioid consumption**

**(A: placebo, B: Gabapentin 300mg, C: Gabapentin 600 mg, D: Gabapentin 800mg, E: Gabapentin 900mg F: Gabapentin 1200mg, G: pregabalin 75mg, H: pregabalin 150mg, I: pregabalin 300mg)**

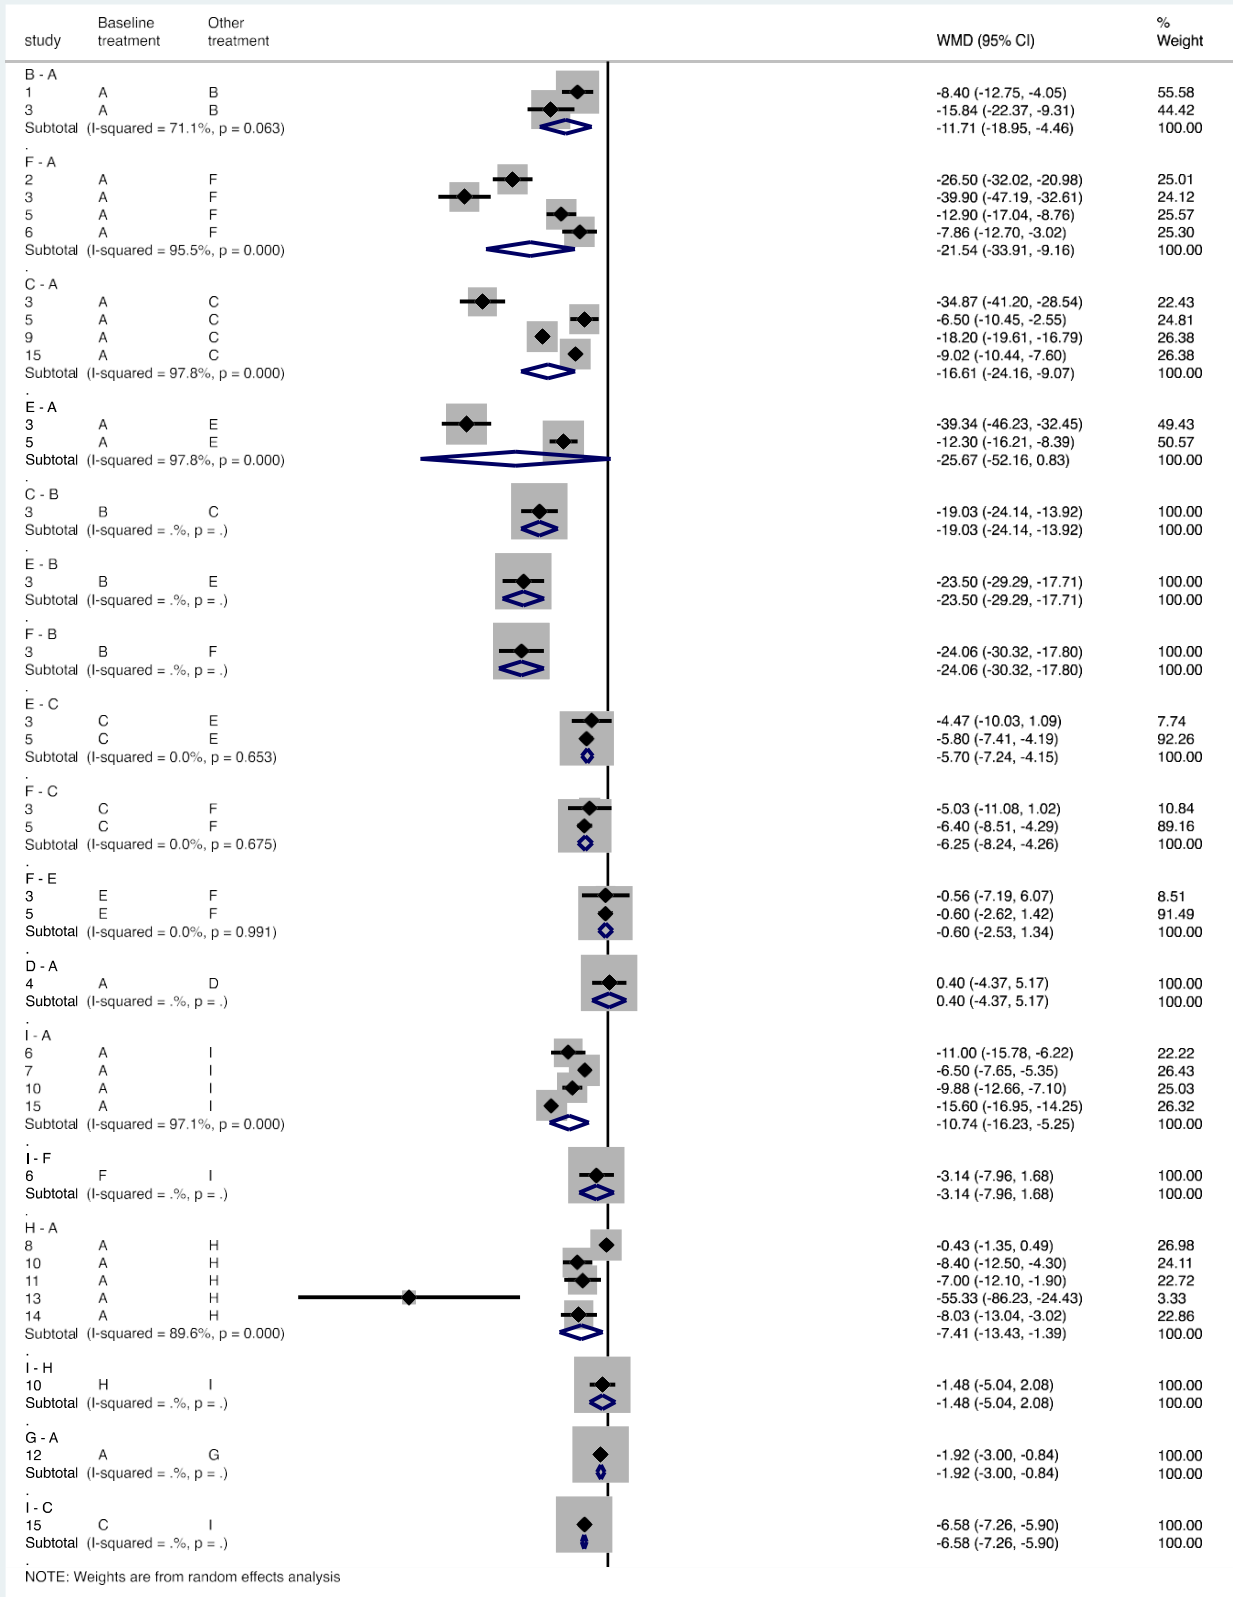

NOTE: Weights are from random effects analysis

|||  
-30.3

**eFigure 6c: Nausea**

**(A: placebo, B: Gabapentin 300mg, C: Gabapentin 600 mg, D: Gabapentin 800mg, E: Gabapentin 900mg, F: Gabapentin 1200mg, G: pregabalin 75mg, H: pregabalin 150mg, I: pregabalin 300mg)**

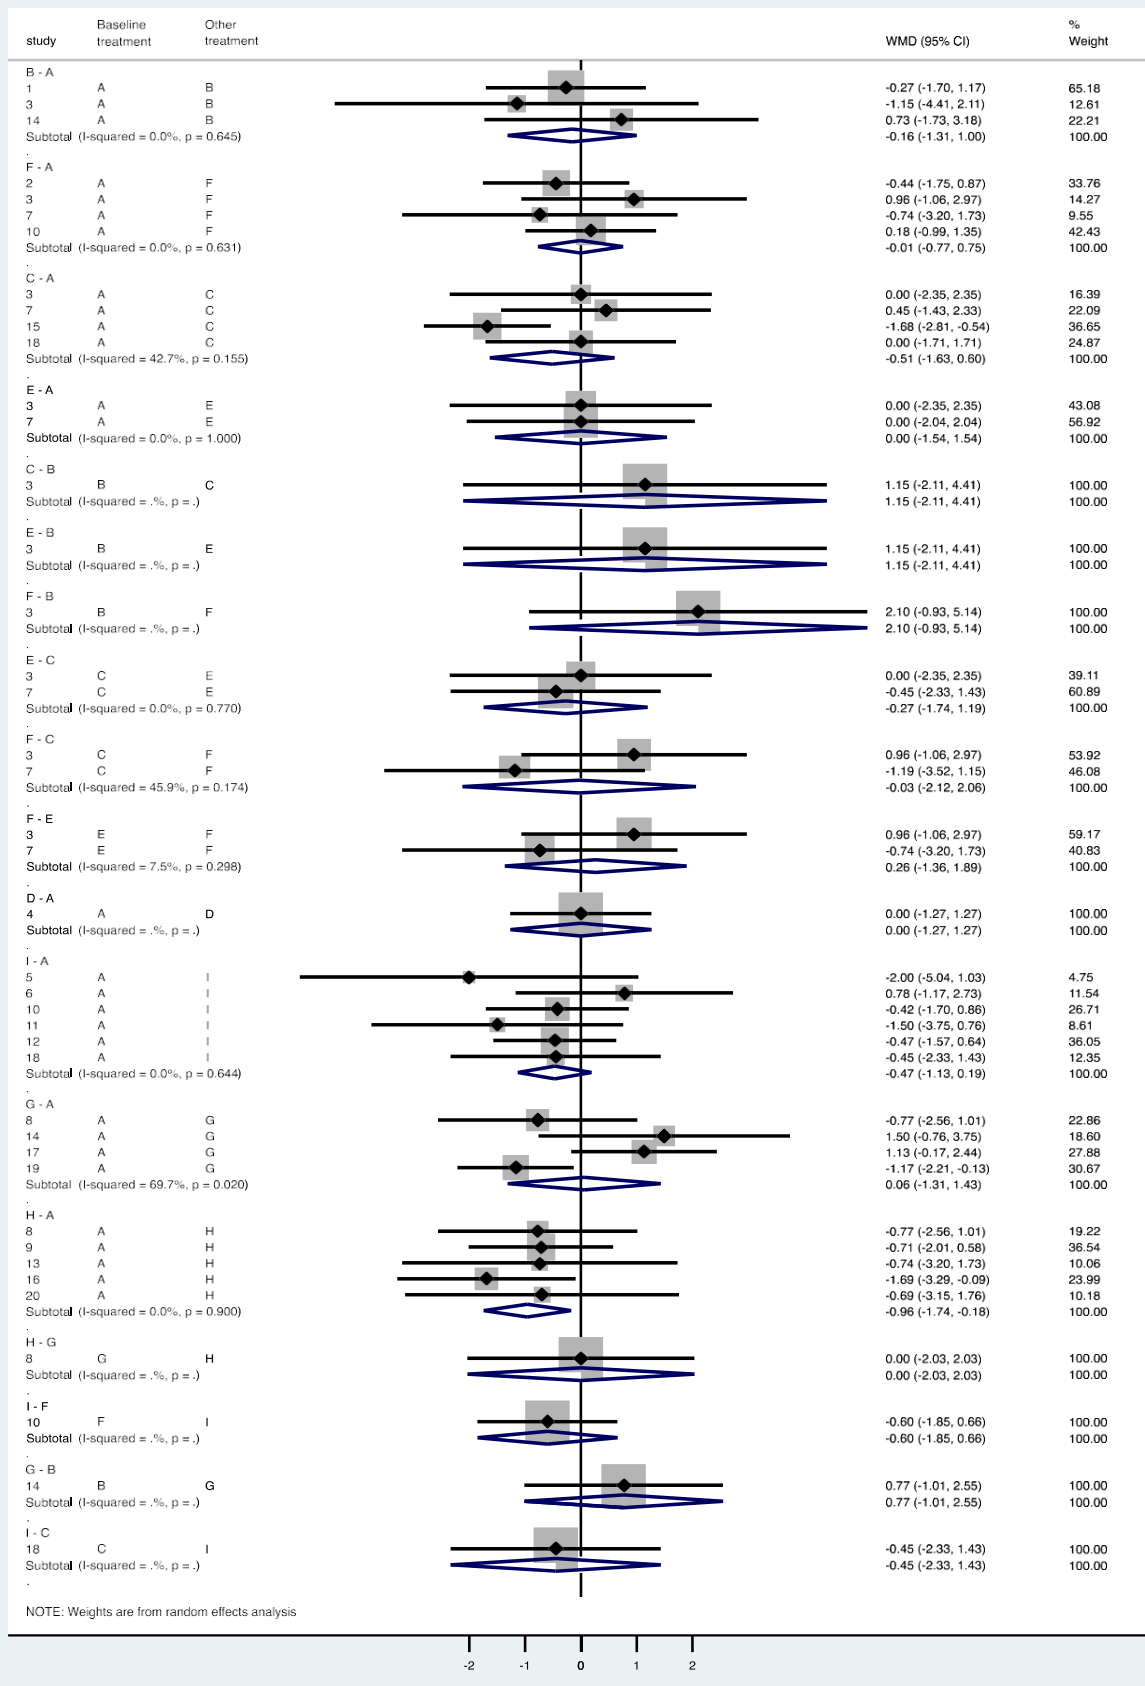



**eFigure 6d: Vomit**

**(A: placebo, B: Gabapentin 300mg, C: Gabapentin 600 mg, D: Gabapentin 800mg, E: Gabapentin 900mg, F: Gabapentin 1200mg, G: pregabalin 75mg, H: pregabalin 150mg, I: pregabalin 300mg)**

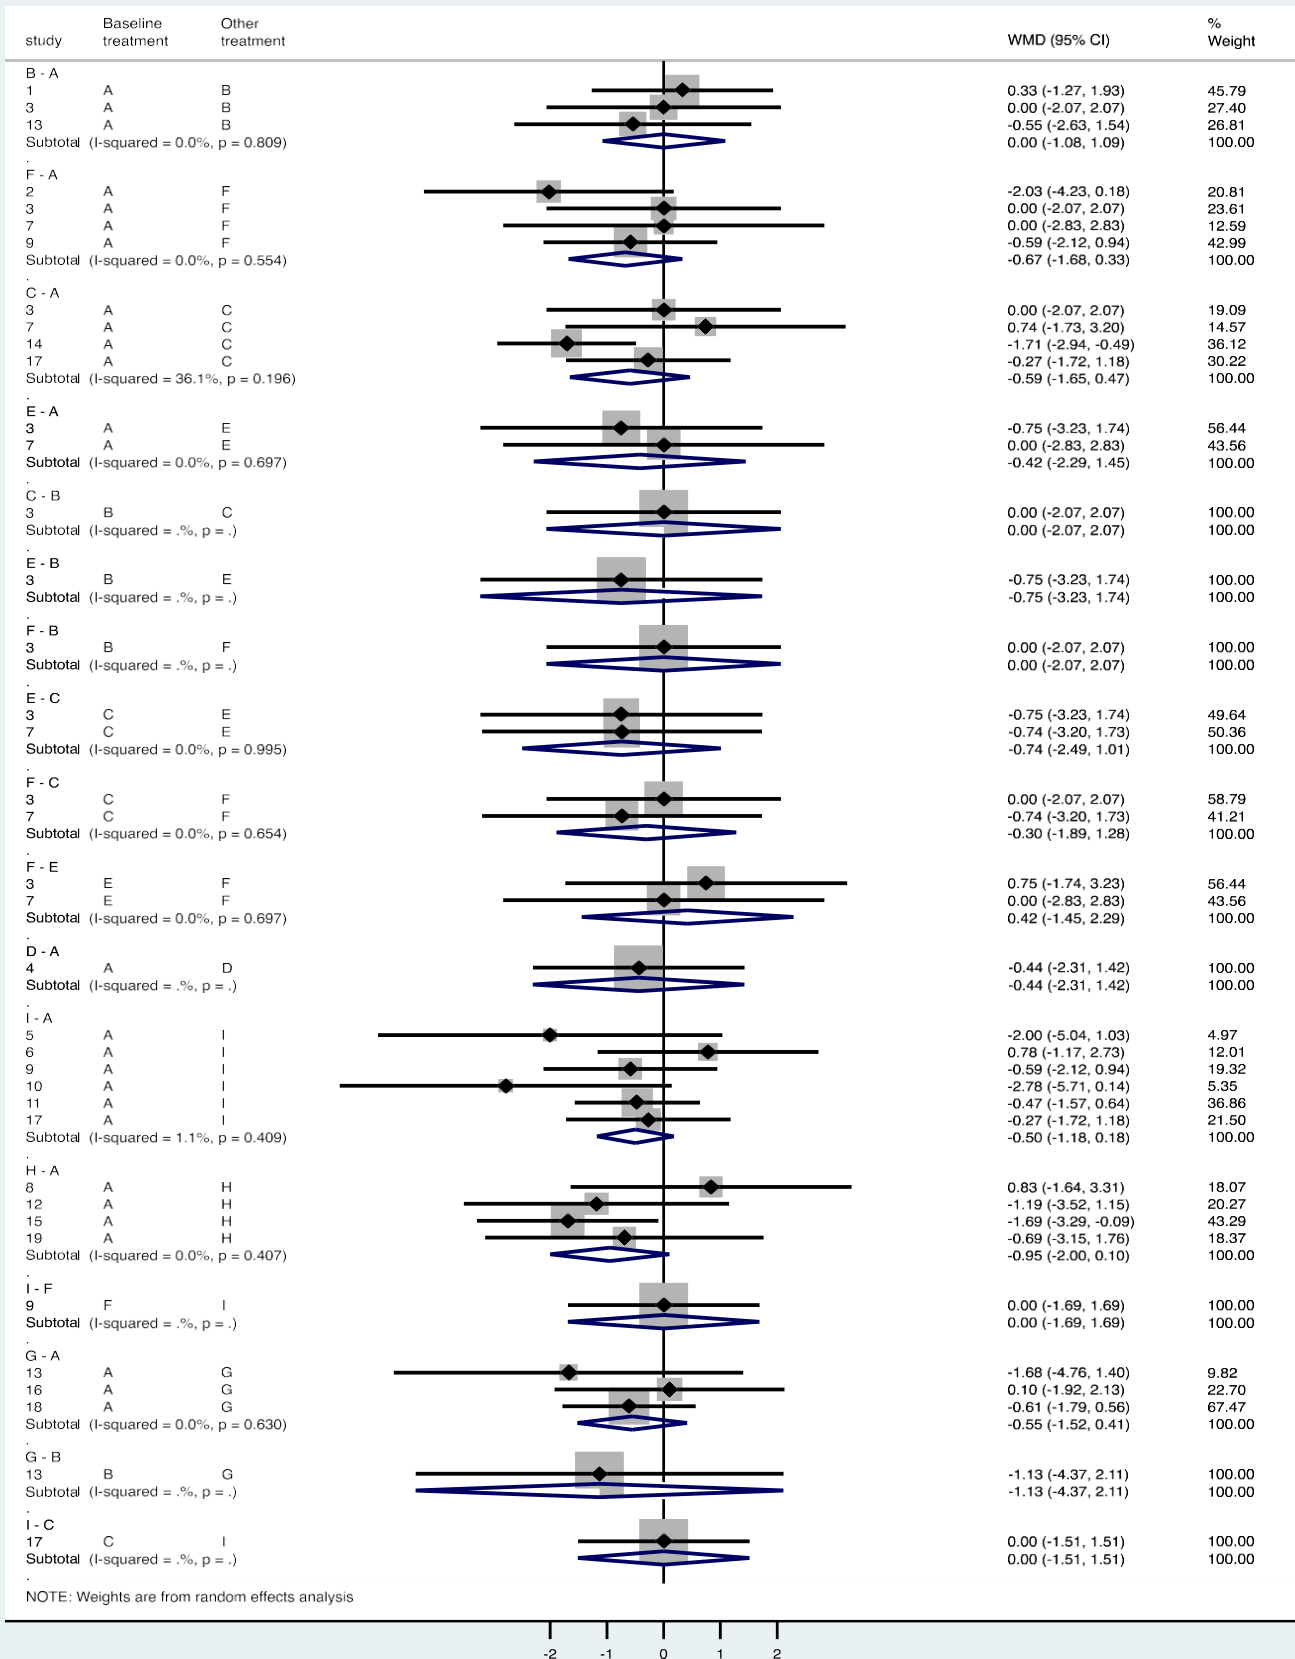

**eFigure 6e: Dizziness**

(A: placebo, B: Gabapentin 300mg, C: Gabapentin 600 mg, D: Gabapentin 900mg, E: Gabapentin 1200mg, F: pregabalin 75mg, G: pregabalin 150mg, H: pregabalin 300mg)

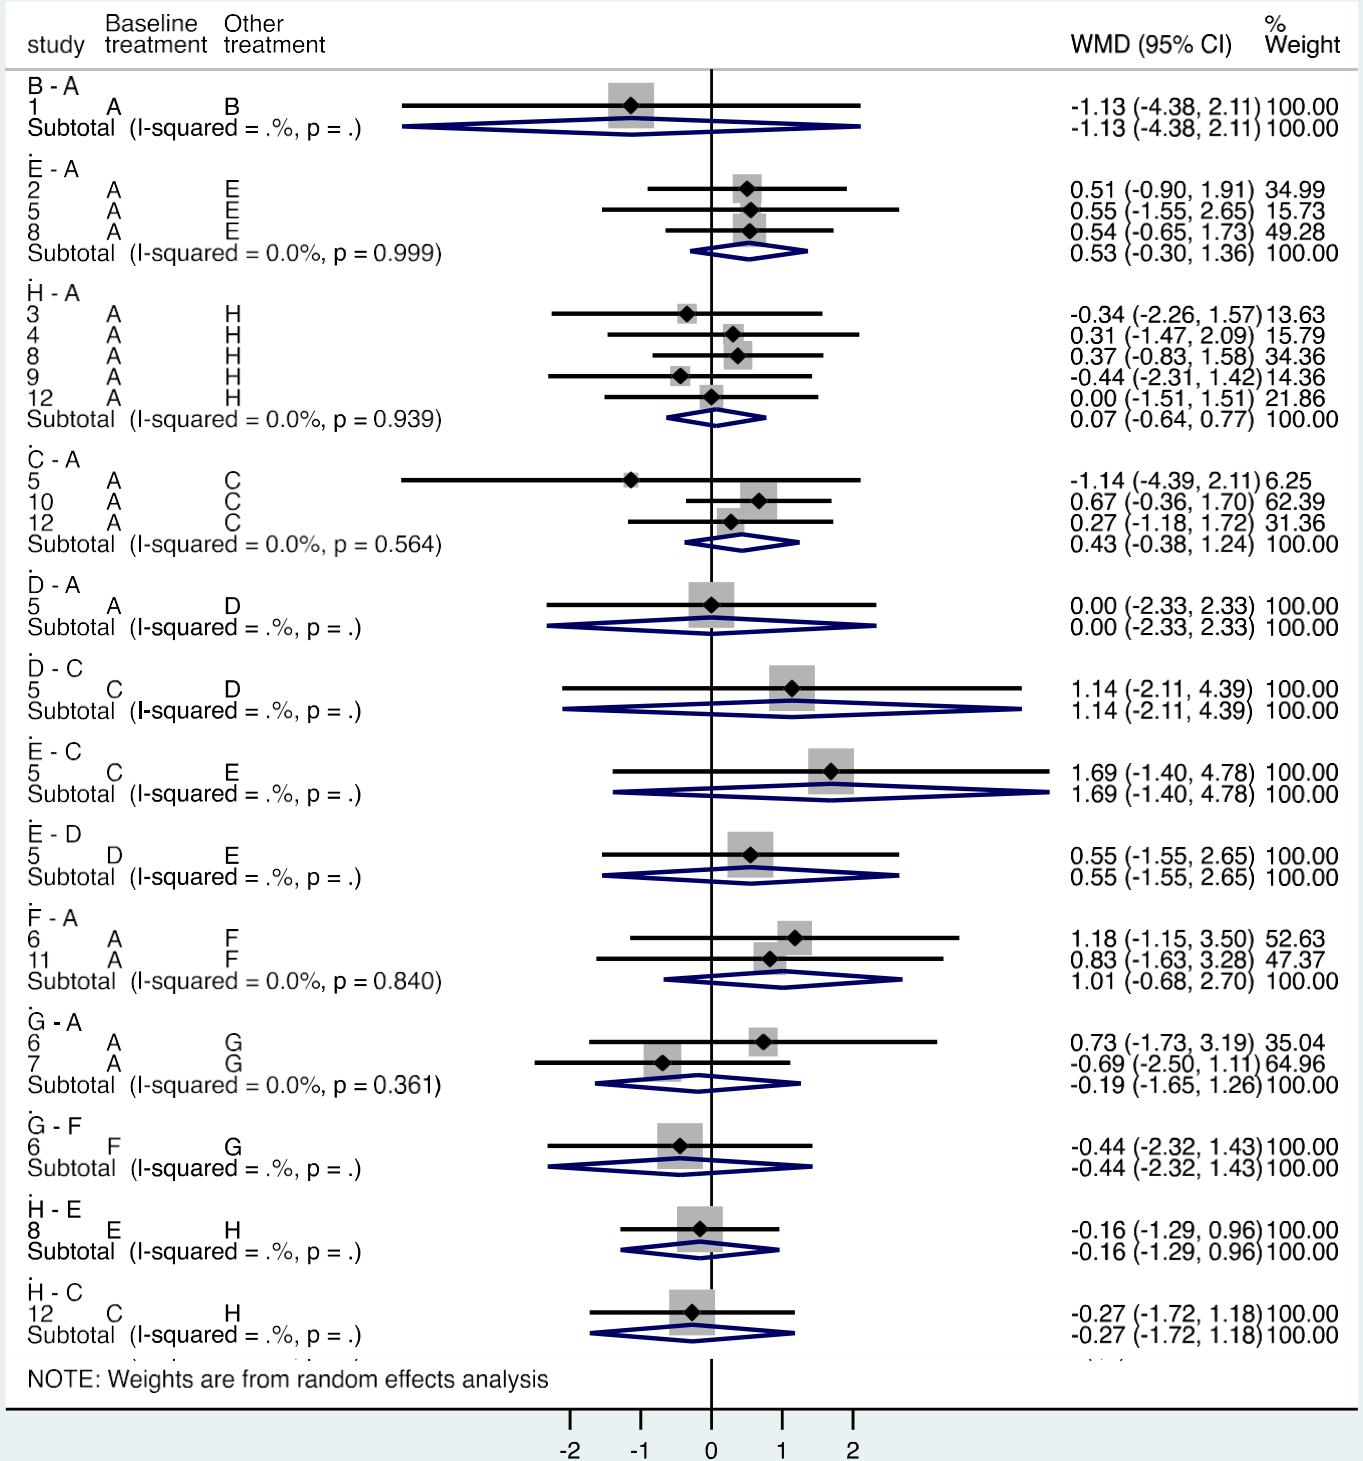

**eFigure 7: Publication Bias Funnel Plot**

**A: VAS**

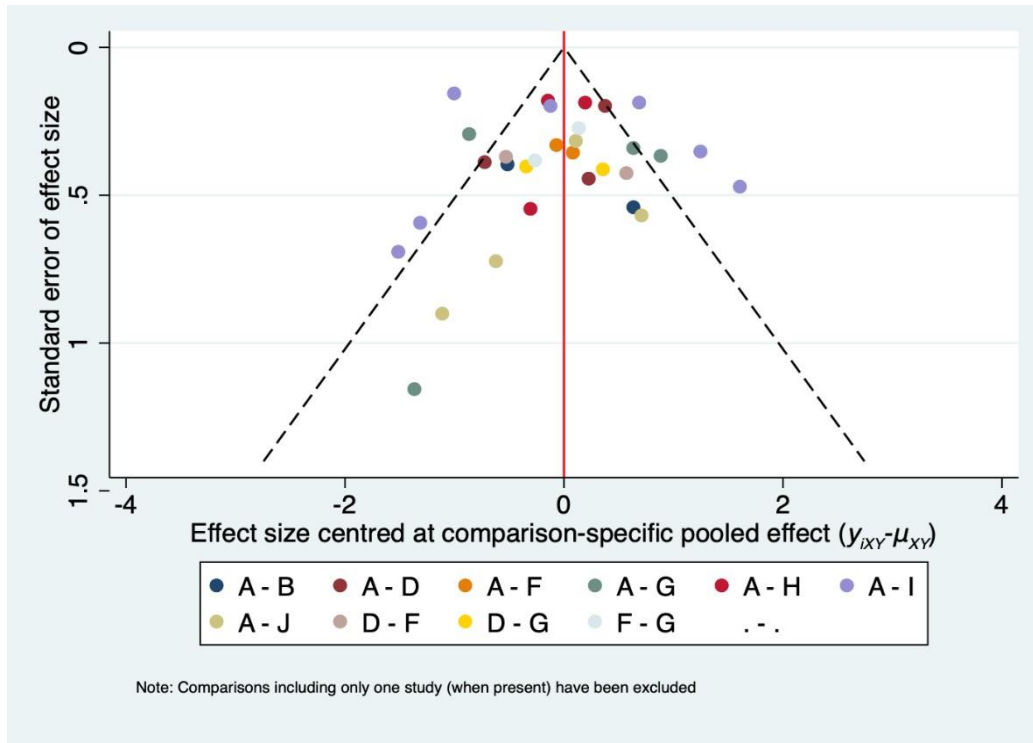

**B: Opioid consumption**

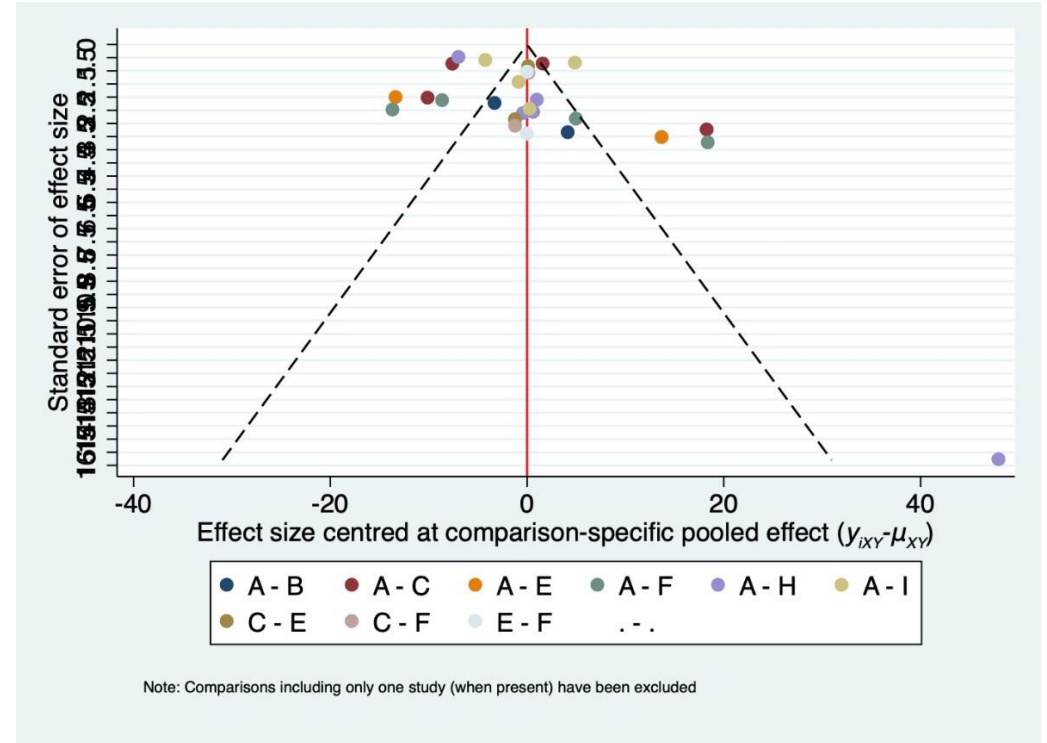

**C: Nausea**

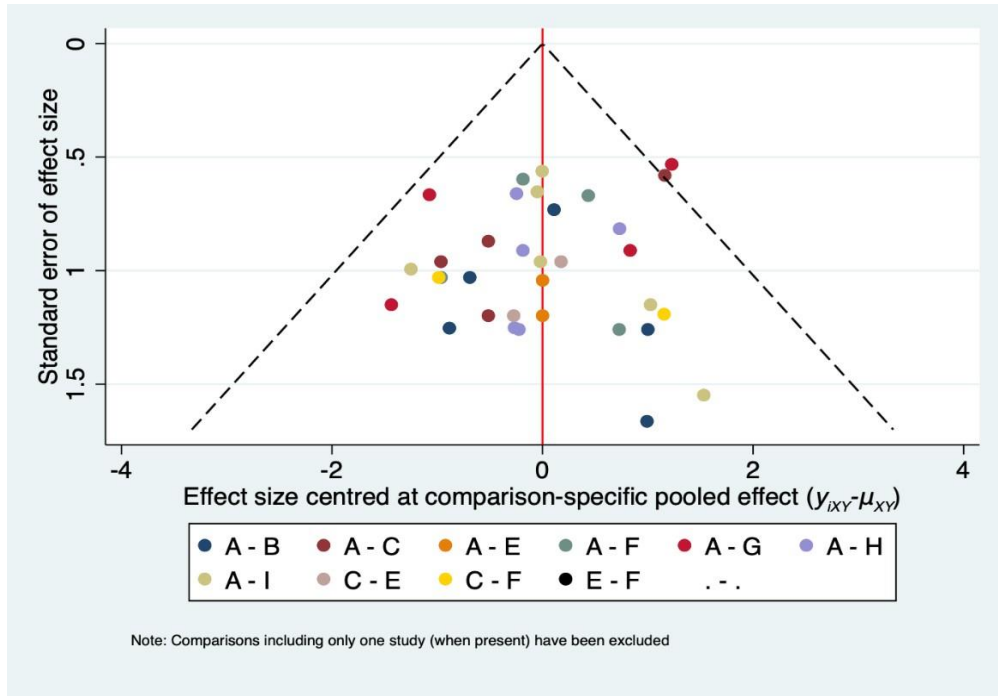

**D: Vomit**

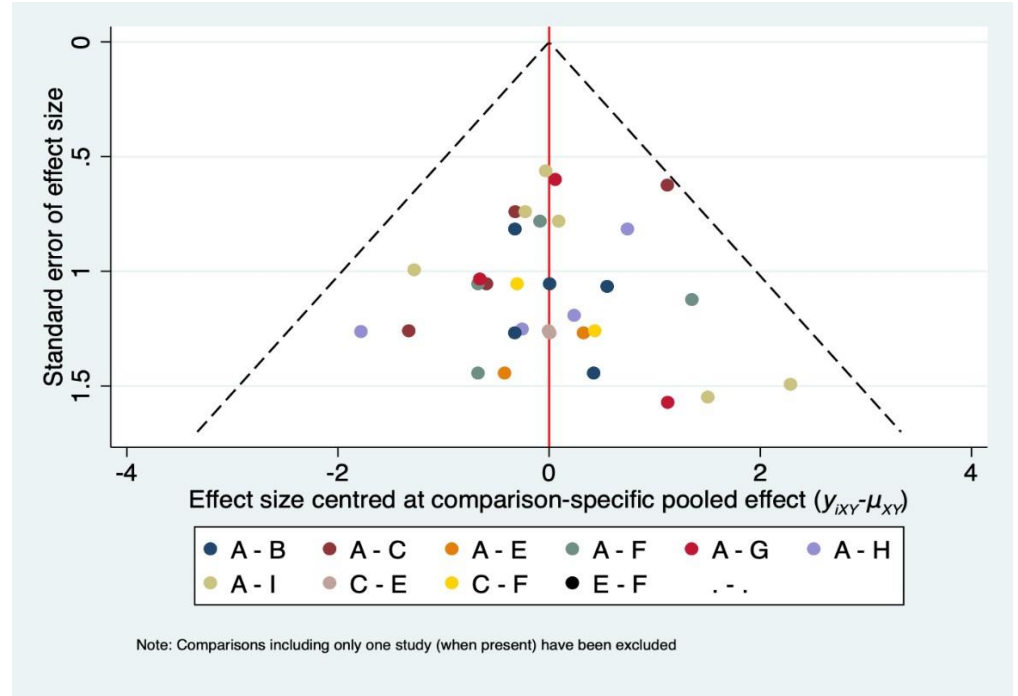

## E: Dizziness

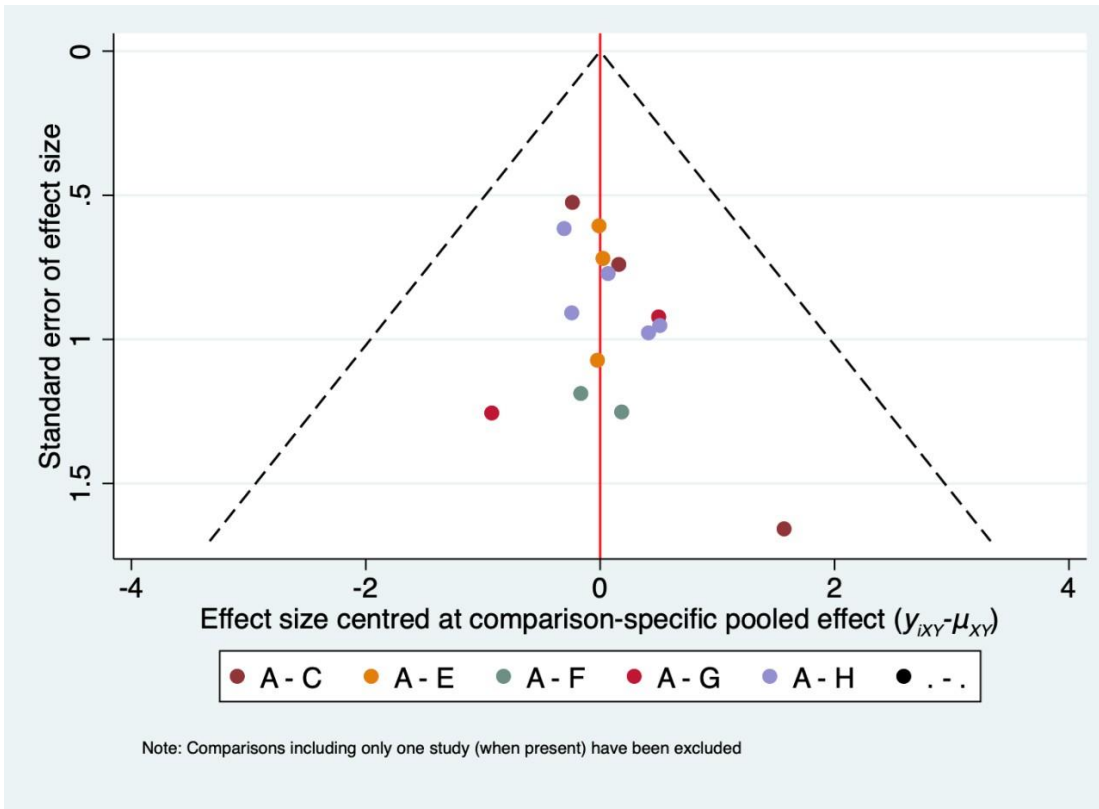

**eFigure 8: Publication Bias: The Egger Test**

**A: VAS**

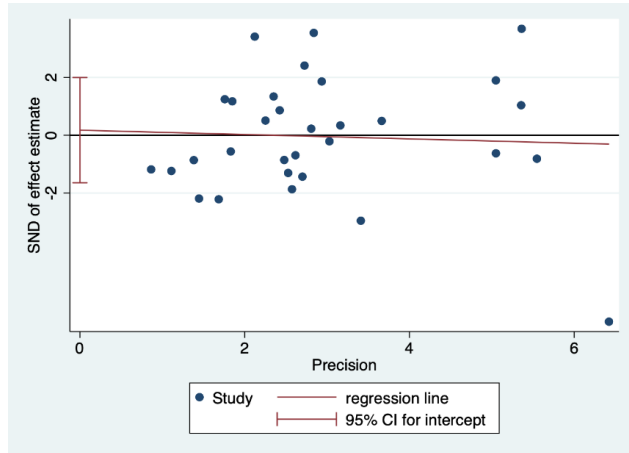

**B: Opioid consumption**

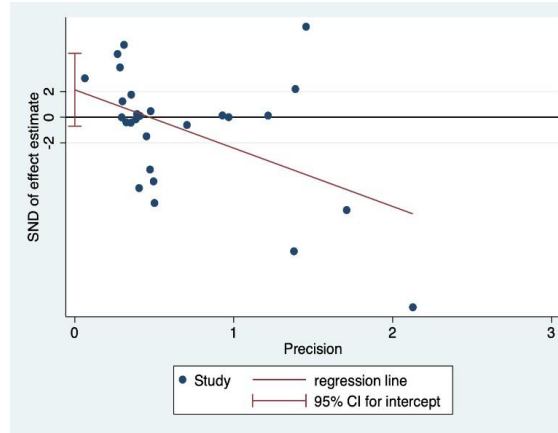

**C: Nausea**

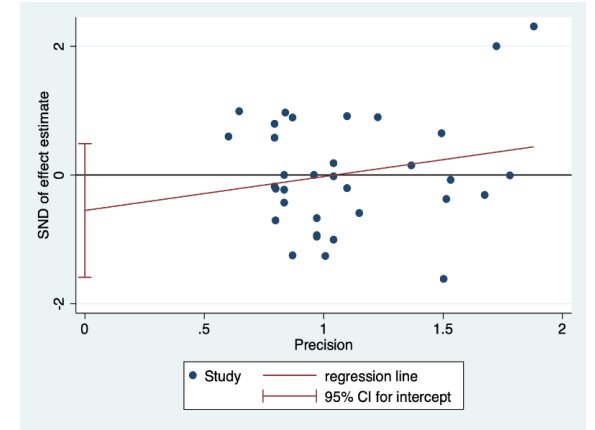

**D: Vomit**

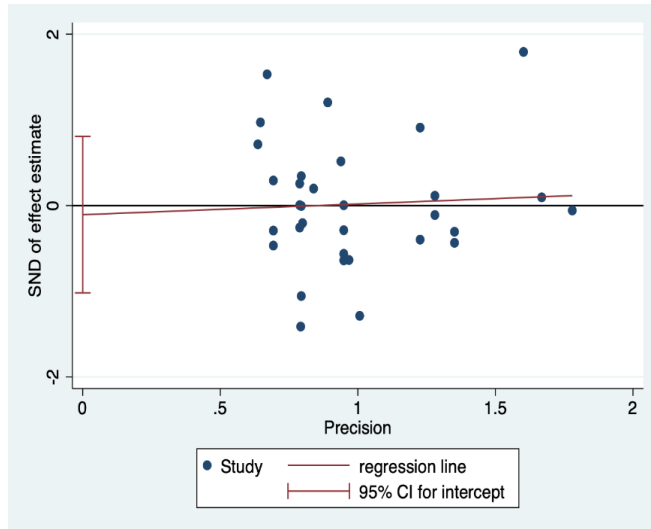

**E: Dizziness**

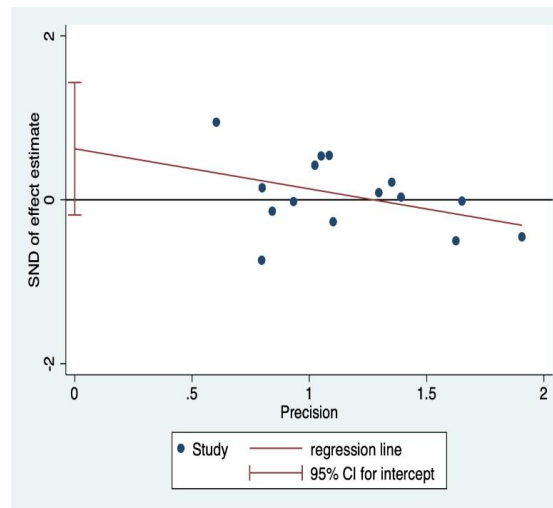

### eFigure 9: CINeMA for the Perioperative Outcomes (VAS, Opioid Consumption, Nausea, Vomit, Dizziness)

**Study limitations (Within study bias):** ROB (Cochrane risk-of-bias tool for randomized trials) was assessed and “Average Risk of Bias” was implemented in CINeMA to calculate the within study bias.

**Publication bias (Across studies bias):** Since p value was  $< 0.05$  from Egger test and no obvious asymmetry was noticed in funnel plot, “all at low risk” was set in CINeMA.

**Indirectness:** we can assume all studies in our analysis had similar distribution in terms of their study population (spinal surgery), intervention (gabapentin/pregabalin) and outcome assessments (VAS, morphine, nausea, etc.) Thus, we judged that there was no serious concern in this domain.

**Imprecision:** In CINeMA setting, we considered a clinically meaningful threshold for mean difference (MD) to be 1 for VAS<sup>1</sup>, and 10mg IV morphine for opioid consumption due to its most common IV form dosage and our analysis showing that the least significant morphine consumption is around 10 mg (Supplementary Figure 5B). Similarly, odds ratio as clinically importance was set to 0.4 for nausea, vomit and dizziness.

**Heterogeneity:** According to CINeMA system, heterogeneity was evaluated through comparing the clinical inference based on the 95% confidence intervals (CI) and 95% prediction interval (PI).<sup>2</sup>

**Incoherence (Inconsistency):** For inconsistency design-by-treatment interaction model was implemented. There was no significance for overall analysis with  $P > 0.05$  while some concerns or major concerns were noted in pair wise comparisons.

**eFigure 9A: CIneMA for VAS**

| Mixed evidence                  |   |               |          |             |                |               |                |          |
|---------------------------------|---|---------------|----------|-------------|----------------|---------------|----------------|----------|
| Gabapentin1200 vs Gabapentin300 | 1 | Some concerns | Low risk | No concerns | Some concerns  | Some concerns | No concerns    | Low      |
| Gabapentin1200 vs Gabapentin600 | 2 | Some concerns | Low risk | No concerns | Some concerns  | Some concerns | Major concerns | Very low |
| Gabapentin1200 vs Gabapentin900 | 2 | Some concerns | Low risk | No concerns | Some concerns  | Some concerns | Major concerns | Very low |
| Gabapentin1200 vs Placebo       | 4 | Some concerns | Low risk | No concerns | No concerns    | No concerns   | No concerns    | Moderate |
| Gabapentin1200 vs Pregabalin300 | 1 | Some concerns | Low risk | No concerns | Some concerns  | Some concerns | No concerns    | Low      |
| Gabapentin300 vs Gabapentin600  | 1 | Some concerns | Low risk | No concerns | Some concerns  | Some concerns | No concerns    | Low      |
| Gabapentin300 vs Gabapentin900  | 1 | Some concerns | Low risk | No concerns | Some concerns  | Some concerns | No concerns    | Low      |
| Gabapentin300 vs Placebo        | 2 | Some concerns | Low risk | No concerns | No concerns    | Some concerns | No concerns    | Low      |
| Gabapentin400 vs Pregabalin150  | 1 | Some concerns | Low risk | No concerns | Major concerns | No concerns   | No concerns    | Low      |
| Gabapentin600 vs Gabapentin900  | 2 | Some concerns | Low risk | No concerns | Some concerns  | Some concerns | No concerns    | Low      |
| Gabapentin600 vs Placebo        | 3 | Some concerns | Low risk | No concerns | No concerns    | No concerns   | No concerns    | Moderate |
| Gabapentin800 vs Placebo        | 1 | No concerns   | Low risk | No concerns | Major concerns | No concerns   | No concerns    | Low      |
| Gabapentin900 vs Placebo        | 2 | Some concerns | Low risk | No concerns | No concerns    | No concerns   | No concerns    | Moderate |
| Placebo vs Pregabalin150        | 7 | Some concerns | Low risk | No concerns | No concerns    | Some concerns | No concerns    | Low      |
| Placebo vs Pregabalin300        | 4 | Some concerns | Low risk | No concerns | No concerns    | Some concerns | No concerns    | Low      |
| Placebo vs Pregabalin75         | 3 | No concerns   | Low risk | No concerns | Some concerns  | Some concerns | No concerns    | Moderate |
| Pregabalin150 vs Pregabalin75   | 1 | No concerns   | Low risk | No concerns | Some concerns  | Some concerns | No concerns    | Moderate |



Indirect evidence

|                                 |    |                                        |          |             |                                         |                                        |             |                                           |
|---------------------------------|----|----------------------------------------|----------|-------------|-----------------------------------------|----------------------------------------|-------------|-------------------------------------------|
| Gabapentin1200 vs Gabapentin400 | -- | Some concerns <input type="checkbox"/> | Low risk | No concerns | Some concerns <input type="checkbox"/>  | Some concerns <input type="checkbox"/> | No concerns | Low <input type="button" value="v"/>      |
| Gabapentin1200 vs Gabapentin800 | -- | Some concerns <input type="checkbox"/> | Low risk | No concerns | Some concerns <input type="checkbox"/>  | Some concerns <input type="checkbox"/> | No concerns | Moderate <input type="button" value="v"/> |
| Gabapentin1200 vs Pregabalin150 | -- | Some concerns <input type="checkbox"/> | Low risk | No concerns | No concerns                             | Some concerns <input type="checkbox"/> | No concerns | Low <input type="button" value="v"/>      |
| Gabapentin1200 vs Pregabalin75  | -- | Some concerns <input type="checkbox"/> | Low risk | No concerns | No concerns                             | Some concerns <input type="checkbox"/> | No concerns | Low <input type="button" value="v"/>      |
| Gabapentin300 vs Gabapentin400  | -- | Some concerns <input type="checkbox"/> | Low risk | No concerns | Major concerns <input type="checkbox"/> | No concerns                            | No concerns | Very low <input type="button" value="v"/> |
| Gabapentin300 vs Gabapentin800  | -- | No concerns                            | Low risk | No concerns | Major concerns <input type="checkbox"/> | No concerns                            | No concerns | Low <input type="button" value="v"/>      |
| Gabapentin300 vs Pregabalin150  | -- | Some concerns <input type="checkbox"/> | Low risk | No concerns | Major concerns <input type="checkbox"/> | No concerns                            | No concerns | Low <input type="button" value="v"/>      |
| Gabapentin300 vs Pregabalin300  | -- | Some concerns <input type="checkbox"/> | Low risk | No concerns | Major concerns <input type="checkbox"/> | No concerns                            | No concerns | Very low <input type="button" value="v"/> |
| Gabapentin300 vs Pregabalin75   | -- | Some concerns <input type="checkbox"/> | Low risk | No concerns | Some concerns <input type="checkbox"/>  | Some concerns <input type="checkbox"/> | No concerns | Low <input type="button" value="v"/>      |
| Gabapentin400 vs Gabapentin600  | -- | Some concerns <input type="checkbox"/> | Low risk | No concerns | Some concerns <input type="checkbox"/>  | Some concerns <input type="checkbox"/> | No concerns | Low <input type="button" value="v"/>      |
| Gabapentin400 vs Gabapentin800  | -- | Some concerns <input type="checkbox"/> | Low risk | No concerns | Major concerns <input type="checkbox"/> | No concerns                            | No concerns | High <input type="button" value="v"/>     |
| Gabapentin400 vs Gabapentin900  | -- | Some concerns <input type="checkbox"/> | Low risk | No concerns | Some concerns <input type="checkbox"/>  | Some concerns <input type="checkbox"/> | No concerns | Low <input type="button" value="v"/>      |
| Gabapentin400 vs Placebo        | -- | Some concerns <input type="checkbox"/> | Low risk | No concerns | Some concerns <input type="checkbox"/>  | Some concerns <input type="checkbox"/> | No concerns | Low <input type="button" value="v"/>      |
| Gabapentin400 vs Pregabalin300  | -- | Some concerns <input type="checkbox"/> | Low risk | No concerns | Major concerns <input type="checkbox"/> | No concerns                            | No concerns | Low <input type="button" value="v"/>      |
| Gabapentin400 vs Pregabalin75   | -- | Some concerns <input type="checkbox"/> | Low risk | No concerns | Major concerns <input type="checkbox"/> | No concerns                            | No concerns | Very low <input type="button" value="v"/> |
| Gabapentin600 vs Gabapentin800  | -- | No concerns                            | Low risk | No concerns | Major concerns <input type="checkbox"/> | No concerns                            | No concerns | Low <input type="button" value="v"/>      |
| Gabapentin600 vs Pregabalin150  | -- | Some concerns <input type="checkbox"/> | Low risk | No concerns | Some concerns <input type="checkbox"/>  | Some concerns <input type="checkbox"/> | No concerns | Low <input type="button" value="v"/>      |
| Gabapentin600 vs Pregabalin300  | -- | Some concerns <input type="checkbox"/> | Low risk | No concerns | Some concerns <input type="checkbox"/>  | Some concerns <input type="checkbox"/> | No concerns | Low <input type="button" value="v"/>      |

|                                |    |                                        |          |             |                                         |                                        |             |                                           |
|--------------------------------|----|----------------------------------------|----------|-------------|-----------------------------------------|----------------------------------------|-------------|-------------------------------------------|
| Gabapentin600 vs Pregabalin75  | -- | Some concerns <input type="checkbox"/> | Low risk | No concerns | Some concerns <input type="checkbox"/>  | Some concerns <input type="checkbox"/> | No concerns | Low <input type="button" value="v"/>      |
| Gabapentin800 vs Gabapentin900 | -- | Some concerns <input type="checkbox"/> | Low risk | No concerns | Some concerns <input type="checkbox"/>  | Some concerns <input type="checkbox"/> | No concerns | Low <input type="button" value="v"/>      |
| Gabapentin800 vs Pregabalin150 | -- | No concerns                            | Low risk | No concerns | Major concerns <input type="checkbox"/> | No concerns                            | No concerns | Low <input type="button" value="v"/>      |
| Gabapentin800 vs Pregabalin300 | -- | No concerns                            | Low risk | No concerns | Major concerns <input type="checkbox"/> | No concerns                            | No concerns | Low <input type="button" value="v"/>      |
| Gabapentin800 vs Pregabalin75  | -- | No concerns                            | Low risk | No concerns | Major concerns <input type="checkbox"/> | No concerns                            | No concerns | Low <input type="button" value="v"/>      |
| Gabapentin900 vs Pregabalin150 | -- | Some concerns <input type="checkbox"/> | Low risk | No concerns | No concerns                             | Some concerns <input type="checkbox"/> | No concerns | Low <input type="button" value="v"/>      |
| Gabapentin900 vs Pregabalin300 | -- | Some concerns <input type="checkbox"/> | Low risk | No concerns | Some concerns <input type="checkbox"/>  | Some concerns <input type="checkbox"/> | No concerns | Low <input type="button" value="v"/>      |
| Gabapentin900 vs Pregabalin75  | -- | Some concerns <input type="checkbox"/> | Low risk | No concerns | No concerns                             | Some concerns <input type="checkbox"/> | No concerns | Low <input type="button" value="v"/>      |
| Pregabalin150 vs Pregabalin300 | -- | Some concerns <input type="checkbox"/> | Low risk | No concerns | Major concerns <input type="checkbox"/> | No concerns                            | No concerns | Very low <input type="button" value="v"/> |
| Pregabalin300 vs Pregabalin75  | -- | Some concerns <input type="checkbox"/> | Low risk | No concerns | Some concerns <input type="checkbox"/>  | Some concerns <input type="checkbox"/> | No concerns | Low <input type="button" value="v"/>      |

eFigure 9B CINeMA for opioid consumption

| Comparison                      | Number of Studies | Within-study bias | Reporting bias | Indirectness | Imprecision    | Heterogeneity | Incoherence    | Confidence rating |
|---------------------------------|-------------------|-------------------|----------------|--------------|----------------|---------------|----------------|-------------------|
| Mixed evidence                  |                   |                   |                |              |                |               |                |                   |
| Gabapentin1200 vs Gabapentin300 | 1                 | Some concerns     | Low risk       | No concerns  | No concerns    | Some concerns | No concerns    | Low               |
| Gabapentin1200 vs Gabapentin600 | 2                 | Some concerns     | Low risk       | No concerns  | Some concerns  | Some concerns | No concerns    | Low               |
| Gabapentin1200 vs Gabapentin900 | 2                 | Some concerns     | Low risk       | No concerns  | Some concerns  | Some concerns | No concerns    | Low               |
| Gabapentin1200 vs Placebo       | 4                 | Some concerns     | Low risk       | No concerns  | No concerns    | No concerns   | No concerns    | Moderate          |
| Gabapentin1200 vs Pregabalin300 | 1                 | Some concerns     | Low risk       | No concerns  | Some concerns  | Some concerns | No concerns    | Low               |
| Gabapentin300 vs Gabapentin600  | 1                 | Some concerns     | Low risk       | No concerns  | Some concerns  | No concerns   | No concerns    | Low               |
| Gabapentin300 vs Gabapentin900  | 1                 | Some concerns     | Low risk       | No concerns  | No concerns    | Some concerns | No concerns    | Low               |
| Gabapentin300 vs Placebo        | 2                 | Some concerns     | Low risk       | No concerns  | Some concerns  | Some concerns | Major concerns | Very low          |
| Gabapentin600 vs Gabapentin900  | 2                 | Some concerns     | Low risk       | No concerns  | Some concerns  | Some concerns | No concerns    | Low               |
| Gabapentin600 vs Placebo        | 4                 | Some concerns     | Low risk       | No concerns  | No concerns    | Some concerns | No concerns    | Low               |
| Gabapentin600 vs Pregabalin300  | 1                 | Some concerns     | Low risk       | No concerns  | Some concerns  | Some concerns | No concerns    | Low               |
| Gabapentin800 vs Placebo        | 1                 | No concerns       | Low risk       | No concerns  | Major concerns | No concerns   | Major concerns | Very low          |
| Gabapentin900 vs Placebo        | 2                 | Some concerns     | Low risk       | No concerns  | No concerns    | No concerns   | No concerns    | Moderate          |
| Placebo vs Pregabalin150        | 5                 | Some concerns     | Low risk       | No concerns  | No concerns    | Some concerns | No concerns    | Low               |
| Placebo vs Pregabalin300        | 4                 | Some concerns     | Low risk       | No concerns  | No concerns    | Some concerns | Some concerns  | Very low          |
| Placebo vs Pregabalin75         | 1                 | Some concerns     | Low risk       | No concerns  | Major concerns | No concerns   | Major concerns | Very low          |
| Pregabalin150 vs Pregabalin300  | 1                 | Some concerns     | Low risk       | No concerns  | Some concerns  | Some concerns | No concerns    | Low               |

Indirect evidence

|                                 |    |               |          |             |                |               |                |          |
|---------------------------------|----|---------------|----------|-------------|----------------|---------------|----------------|----------|
| Gabapentin1200 vs Gabapentin800 | -- | No concerns   | Low risk | No concerns | No concerns    | Some concerns | Major concerns | Very low |
| Gabapentin1200 vs Pregabalin150 | -- | Some concerns | Low risk | No concerns | No concerns    | Some concerns | Major concerns | Very low |
| Gabapentin1200 vs Pregabalin75  | -- | Some concerns | Low risk | No concerns | No concerns    | Some concerns | Major concerns | Very low |
| Gabapentin300 vs Gabapentin800  | -- | No concerns   | Low risk | No concerns | Major concerns | No concerns   | Major concerns | Very low |
| Gabapentin300 vs Pregabalin150  | -- | Some concerns | Low risk | No concerns | Some concerns  | Some concerns | Major concerns | Very low |
| Gabapentin300 vs Pregabalin300  | -- | Some concerns | Low risk | No concerns | Some concerns  | Some concerns | Major concerns | Very low |
| Gabapentin300 vs Pregabalin75   | -- | Some concerns | Low risk | No concerns | Major concerns | No concerns   | Major concerns | Very low |
| Gabapentin600 vs Gabapentin800  | -- | No concerns   | Low risk | No concerns | Some concerns  | No concerns   | Major concerns | Very low |
| Gabapentin600 vs Pregabalin150  | -- | Some concerns | Low risk | No concerns | Some concerns  | Some concerns | Major concerns | Very low |
| Gabapentin600 vs Pregabalin75   | -- | Some concerns | Low risk | No concerns | Some concerns  | Some concerns | Major concerns | Very low |
| Gabapentin800 vs Gabapentin900  | -- | Some concerns | Low risk | No concerns | No concerns    | Some concerns | Major concerns | Very low |
| Gabapentin800 vs Pregabalin150  | -- | No concerns   | Low risk | No concerns | Some concerns  | Some concerns | Major concerns | Very low |
| Gabapentin800 vs Pregabalin300  | -- | No concerns   | Low risk | No concerns | Some concerns  | Some concerns | Major concerns | Very low |
| Gabapentin800 vs Pregabalin75   | -- | Some concerns | Low risk | No concerns | Major concerns | No concerns   | Major concerns | Very low |
| Gabapentin900 vs Pregabalin150  | -- | Some concerns | Low risk | No concerns | No concerns    | Some concerns | Major concerns | Very low |
| Gabapentin900 vs Pregabalin300  | -- | Some concerns | Low risk | No concerns | Some concerns  | Some concerns | Major concerns | Very low |
| Gabapentin900 vs Pregabalin75   | -- | Some concerns | Low risk | No concerns | No concerns    | Some concerns | Major concerns | Very low |
| Pregabalin150 vs Pregabalin75   | -- | Some concerns | Low risk | No concerns | Some concerns  | Some concerns | Major concerns | Very low |
| Pregabalin300 vs Pregabalin75   | -- | Some concerns | Low risk | No concerns | Some concerns  | Some concerns | Major concerns | Very low |

eFigure 9C: CINeMA for Nausea

| Comparison                      | Number of Studies | Within-study bias | Reporting bias | Indirectness | Imprecision    | Heterogeneity | Incoherence | Confidence rating |
|---------------------------------|-------------------|-------------------|----------------|--------------|----------------|---------------|-------------|-------------------|
| Mixed evidence                  |                   |                   |                |              |                |               |             |                   |
| Gabapentin1200 vs Gabapentin300 | 1                 | Some concerns     | Low risk       | No concerns  | Some concerns  | Some concerns | No concerns | Low               |
| Gabapentin1200 vs Gabapentin600 | 2                 | Some concerns     | Low risk       | No concerns  | Some concerns  | No concerns   | No concerns | Low               |
| Gabapentin1200 vs Gabapentin900 | 2                 | Some concerns     | Low risk       | No concerns  | Major concerns | No concerns   | No concerns | Very low          |
| Gabapentin1200 vs Placebo       | 4                 | Some concerns     | Low risk       | No concerns  | No concerns    | High concerns | No concerns | Very low          |
| Gabapentin1200 vs Pregabalin300 | 1                 | Some concerns     | Low risk       | No concerns  | Some concerns  | No concerns   | No concerns | Low               |
| Gabapentin300 vs Gabapentin600  | 1                 | Some concerns     | Low risk       | No concerns  | Major concerns | No concerns   | No concerns | Very low          |
| Gabapentin300 vs Gabapentin900  | 1                 | Some concerns     | Low risk       | No concerns  | Major concerns | No concerns   | No concerns | Very low          |
| Gabapentin300 vs Placebo        | 3                 | No concerns       | Low risk       | No concerns  | Some concerns  | No concerns   | No concerns | Moderate          |
| Gabapentin300 vs Pregabalin75   | 1                 | Some concerns     | Low risk       | No concerns  | Some concerns  | Some concerns | No concerns | Low               |
| Gabapentin600 vs Gabapentin900  | 2                 | Some concerns     | Low risk       | No concerns  | Major concerns | No concerns   | No concerns | Very low          |
| Gabapentin600 vs Placebo        | 4                 | Some concerns     | Low risk       | No concerns  | Some concerns  | No concerns   | No concerns | Low               |
| Gabapentin600 vs Pregabalin300  | 1                 | Some concerns     | Low risk       | No concerns  | Major concerns | No concerns   | No concerns | Very low          |
| Gabapentin800 vs Placebo        | 1                 | No concerns       | Low risk       | No concerns  | Major concerns | No concerns   | No concerns | Very low          |
| Gabapentin900 vs Placebo        | 2                 | Some concerns     | Low risk       | No concerns  | Some concerns  | Some concerns | No concerns | Low               |
| Placebo vs Pregabalin150        | 5                 | Some concerns     | Low risk       | No concerns  | No concerns    | Some concerns | No concerns | Low               |
| Placebo vs Pregabalin300        | 6                 | No concerns       | Low risk       | No concerns  | Some concerns  | No concerns   | No concerns | Low               |
| Placebo vs Pregabalin75         | 4                 | Some concerns     | Low risk       | No concerns  | No concerns    | Some concerns | No concerns | Low               |
| Pregabalin150 vs Pregabalin75   | 1                 | Some concerns     | Low risk       | No concerns  | Some concerns  | No concerns   | No concerns | Low               |

Indirect evidence

|                                 |    |               |          |             |                |               |             |          |
|---------------------------------|----|---------------|----------|-------------|----------------|---------------|-------------|----------|
| Gabapentin1200 vs Gabapentin800 | -- | No concerns   | Low risk | No concerns | Major concerns | No concerns   | No concerns | Low      |
| Gabapentin1200 vs Pregabalin150 | -- | Some concerns | Low risk | No concerns | Some concerns  | No concerns   | No concerns | Low      |
| Gabapentin1200 vs Pregabalin75  | -- | Some concerns | Low risk | No concerns | Major concerns | No concerns   | No concerns | Very low |
| Gabapentin300 vs Gabapentin800  | -- | No concerns   | Low risk | No concerns | Major concerns | No concerns   | No concerns | Low      |
| Gabapentin300 vs Pregabalin150  | -- | Some concerns | Low risk | No concerns | Major concerns | No concerns   | No concerns | Very low |
| Gabapentin300 vs Pregabalin300  | -- | Some concerns | Low risk | No concerns | Major concerns | No concerns   | No concerns | Very low |
| Gabapentin600 vs Gabapentin800  | -- | No concerns   | Low risk | No concerns | Major concerns | No concerns   | No concerns | Low      |
| Gabapentin600 vs Pregabalin150  | -- | Some concerns | Low risk | No concerns | Some concerns  | Some concerns | No concerns | Low      |
| Gabapentin600 vs Pregabalin75   | -- | Some concerns | Low risk | No concerns | Some concerns  | No concerns   | No concerns | Low      |
| Gabapentin800 vs Gabapentin900  | -- | Some concerns | Low risk | No concerns | Major concerns | No concerns   | No concerns | Very low |
| Gabapentin800 vs Pregabalin150  | -- | No concerns   | Low risk | No concerns | Some concerns  | No concerns   | No concerns | Moderate |
| Gabapentin800 vs Pregabalin300  | -- | No concerns   | Low risk | No concerns | Major concerns | No concerns   | No concerns | Low      |
| Gabapentin800 vs Pregabalin75   | -- | No concerns   | Low risk | No concerns | Major concerns | No concerns   | No concerns | Low      |
| Gabapentin900 vs Pregabalin150  | -- | Some concerns | Low risk | No concerns | Major concerns | No concerns   | No concerns | Very low |
| Gabapentin900 vs Pregabalin300  | -- | Some concerns | Low risk | No concerns | Major concerns | No concerns   | No concerns | Very low |
| Gabapentin900 vs Pregabalin75   | -- | Some concerns | Low risk | No concerns | Major concerns | No concerns   | No concerns | Low      |
| Pregabalin150 vs Pregabalin300  | -- | Some concerns | Low risk | No concerns | Some concerns  | Some concerns | No concerns | Low      |
| Pregabalin300 vs Pregabalin75   | -- | Some concerns | Low risk | No concerns | Some concerns  | No concerns   | No concerns | Low      |

**eFigure 9D: CIneMA for Vomit**

| Comparison                      | Number of Studies | Within-study bias | Reporting bias | Indirectness | Imprecision    | Heterogeneity | Incoherence | Confidence rating |
|---------------------------------|-------------------|-------------------|----------------|--------------|----------------|---------------|-------------|-------------------|
| Mixed evidence                  |                   |                   |                |              |                |               |             |                   |
| Gabapentin1200 vs Gabapentin300 | 1                 | Some concerns     | Low risk       | No concerns  | Some concerns  | No concerns   | No concerns | Low               |
| Gabapentin1200 vs Gabapentin600 | 2                 | Some concerns     | Low risk       | No concerns  | Major concerns | No concerns   | No concerns | Very low          |
| Gabapentin1200 vs Gabapentin900 | 2                 | Some concerns     | Low risk       | No concerns  | Major concerns | No concerns   | No concerns | Very low          |
| Gabapentin1200 vs Placebo       | 4                 | Some concerns     | Low risk       | No concerns  | Some concerns  | No concerns   | No concerns | Low               |
| Gabapentin1200 vs Pregabalin300 | 1                 | Some concerns     | Low risk       | No concerns  | Some concerns  | No concerns   | No concerns | Low               |
| Gabapentin300 vs Gabapentin600  | 1                 | Some concerns     | Low risk       | No concerns  | Some concerns  | No concerns   | No concerns | Low               |
| Gabapentin300 vs Gabapentin900  | 1                 | Some concerns     | Low risk       | No concerns  | Some concerns  | Some concerns | No concerns | Low               |
| Gabapentin300 vs Placebo        | 3                 | Some concerns     | Low risk       | No concerns  | Some concerns  | Some concerns | No concerns | Low               |
| Gabapentin300 vs Pregabalin75   | 1                 | Some concerns     | Low risk       | No concerns  | Major concerns | No concerns   | No concerns | Very low          |
| Gabapentin600 vs Gabapentin900  | 2                 | Some concerns     | Low risk       | No concerns  | Major concerns | No concerns   | No concerns | Very low          |
| Gabapentin600 vs Placebo        | 4                 | Some concerns     | Low risk       | No concerns  | No concerns    | Some concerns | No concerns | Low               |
| Gabapentin600 vs Pregabalin300  | 1                 | Some concerns     | Low risk       | No concerns  | Some concerns  | No concerns   | No concerns | Low               |
| Gabapentin800 vs Placebo        | 1                 | No concerns       | Low risk       | No concerns  | Major concerns | No concerns   | No concerns | Low               |
| Gabapentin900 vs Placebo        | 2                 | Some concerns     | Low risk       | No concerns  | Some concerns  | No concerns   | No concerns | Low               |
| Placebo vs Pregabalin150        | 4                 | Some concerns     | Low risk       | No concerns  | Some concerns  | No concerns   | No concerns | Low               |
| Placebo vs Pregabalin300        | 6                 | No concerns       | Low risk       | No concerns  | Some concerns  | No concerns   | No concerns | Moderate          |
| Placebo vs Pregabalin75         | 3                 | Some concerns     | Low risk       | No concerns  | Some concerns  | No concerns   | No concerns | Low               |

Indirect evidence

|                                 |    |               |          |             |                |               |             |          |
|---------------------------------|----|---------------|----------|-------------|----------------|---------------|-------------|----------|
| Gabapentin1200 vs Gabapentin800 | -- | No concerns   | Low risk | No concerns | Major concerns | No concerns   | No concerns | Low      |
| Gabapentin1200 vs Pregabalin150 | -- | Some concerns | Low risk | No concerns | Major concerns | No concerns   | No concerns | Low      |
| Gabapentin1200 vs Pregabalin75  | -- | Some concerns | Low risk | No concerns | Major concerns | No concerns   | No concerns | Very low |
| Gabapentin300 vs Gabapentin800  | -- | No concerns   | Low risk | No concerns | Major concerns | No concerns   | No concerns | Low      |
| Gabapentin300 vs Pregabalin150  | -- | Some concerns | Low risk | No concerns | Some concerns  | No concerns   | No concerns | Low      |
| Gabapentin300 vs Pregabalin300  | -- | Some concerns | Low risk | No concerns | Some concerns  | No concerns   | No concerns | Low      |
| Gabapentin600 vs Gabapentin800  | -- | No concerns   | Low risk | No concerns | Major concerns | No concerns   | No concerns | Low      |
| Gabapentin600 vs Pregabalin150  | -- | Some concerns | Low risk | No concerns | Major concerns | No concerns   | No concerns | Very low |
| Gabapentin600 vs Pregabalin75   | -- | Some concerns | Low risk | No concerns | Major concerns | No concerns   | No concerns | Very low |
| Gabapentin800 vs Gabapentin900  | -- | Some concerns | Low risk | No concerns | Major concerns | No concerns   | No concerns | Very low |
| Gabapentin800 vs Pregabalin150  | -- | No concerns   | Low risk | No concerns | Major concerns | No concerns   | No concerns | Low      |
| Gabapentin800 vs Pregabalin300  | -- | No concerns   | Low risk | No concerns | Major concerns | No concerns   | No concerns | Low      |
| Gabapentin800 vs Pregabalin75   | -- | No concerns   | Low risk | No concerns | Major concerns | No concerns   | No concerns | Low      |
| Gabapentin900 vs Pregabalin150  | -- | Some concerns | Low risk | No concerns | Major concerns | No concerns   | No concerns | Very low |
| Gabapentin900 vs Pregabalin300  | -- | Some concerns | Low risk | No concerns | Major concerns | No concerns   | No concerns | Very low |
| Gabapentin900 vs Pregabalin75   | -- | Some concerns | Low risk | No concerns | Major concerns | No concerns   | No concerns | Very low |
| Pregabalin150 vs Pregabalin300  | -- | Some concerns | Low risk | No concerns | Some concerns  | Some concerns | No concerns | Low      |
| Pregabalin150 vs Pregabalin75   | -- | Some concerns | Low risk | No concerns | Major concerns | No concerns   | No concerns | Very low |
| Pregabalin300 vs Pregabalin75   | -- | Some concerns | Low risk | No concerns | Major concerns | No concerns   | No concerns | Very low |



**eFigure 9E** CINeMA for Dizziness

| Comparison                      | Number of Studies | Within-study bias | Reporting bias | Indirectness | Imprecision    | Heterogeneity | Incoherence | Confidence rating |
|---------------------------------|-------------------|-------------------|----------------|--------------|----------------|---------------|-------------|-------------------|
| Mixed evidence                  |                   |                   |                |              |                |               |             |                   |
| Gabapentin1200 vs Gabapentin600 | 1                 | Some concerns     | Low risk       | No concerns  | Major concerns | No concerns   | No concerns | Very low          |
| Gabapentin1200 vs Gabapentin900 | 1                 | Some concerns     | Low risk       | No concerns  | Major concerns | No concerns   | No concerns | Very low          |
| Gabapentin1200 vs Placebo       | 3                 | Some concerns     | Low risk       | No concerns  | Some concerns  | No concerns   | No concerns | Low               |
| Gabapentin1200 vs Pregabalin300 | 1                 | Some concerns     | Low risk       | No concerns  | Some concerns  | No concerns   | No concerns | Low               |
| Gabapentin300 vs Placebo        | 1                 | No concerns       | Low risk       | No concerns  | Major concerns | No concerns   | No concerns | Low               |
| Gabapentin600 vs Gabapentin900  | 1                 | Some concerns     | Low risk       | No concerns  | Major concerns | No concerns   | No concerns | Very low          |
| Gabapentin600 vs Placebo        | 3                 | No concerns       | Low risk       | No concerns  | Some concerns  | No concerns   | No concerns | Moderate          |
| Gabapentin600 vs Pregabalin300  | 1                 | Some concerns     | Low risk       | No concerns  | Some concerns  | No concerns   | No concerns | Low               |
| Gabapentin900 vs Placebo        | 1                 | Some concerns     | Low risk       | No concerns  | Major concerns | No concerns   | No concerns | Very low          |
| Placebo vs Pregabalin150        | 2                 | Some concerns     | Low risk       | No concerns  | Major concerns | No concerns   | No concerns | Very low          |
| Placebo vs Pregabalin300        | 5                 | Some concerns     | Low risk       | No concerns  | No concerns    | No concerns   | No concerns | Moderate          |
| Placebo vs Pregabalin75         | 2                 | No concerns       | Low risk       | No concerns  | Some concerns  | Some concerns | No concerns | Moderate          |
| Pregabalin150 vs Pregabalin75   | 1                 | No concerns       | Low risk       | No concerns  | Some concerns  | Some concerns | No concerns | Moderate          |

Indirect evidence

|                                 |    |               |          |             |                |             |             |          |
|---------------------------------|----|---------------|----------|-------------|----------------|-------------|-------------|----------|
| Gabapentin1200 vs Gabapentin300 | -- | No concerns   | Low risk | No concerns | Major concerns | No concerns | No concerns | Very low |
| Gabapentin1200 vs Pregabalin150 | -- | Some concerns | Low risk | No concerns | Major concerns | No concerns | No concerns | Very low |
| Gabapentin1200 vs Pregabalin75  | -- | No concerns   | Low risk | No concerns | Major concerns | No concerns | No concerns | Low      |
| Gabapentin300 vs Gabapentin600  | -- | No concerns   | Low risk | No concerns | Major concerns | No concerns | No concerns | Low      |
| Gabapentin300 vs Gabapentin900  | -- | Some concerns | Low risk | No concerns | Major concerns | No concerns | No concerns | Very low |
| Gabapentin300 vs Pregabalin150  | -- | No concerns   | Low risk | No concerns | Major concerns | No concerns | No concerns | Low      |
| Gabapentin300 vs Pregabalin300  | -- | No concerns   | Low risk | No concerns | Major concerns | No concerns | No concerns | Low      |
| Gabapentin300 vs Pregabalin75   | -- | No concerns   | Low risk | No concerns | Major concerns | No concerns | No concerns | Low      |
| Gabapentin600 vs Pregabalin150  | -- | Some concerns | Low risk | No concerns | Major concerns | No concerns | No concerns | Very low |
| Gabapentin600 vs Pregabalin75   | -- | No concerns   | Low risk | No concerns | Major concerns | No concerns | No concerns | Low      |
| Gabapentin900 vs Pregabalin150  | -- | Some concerns | Low risk | No concerns | Major concerns | No concerns | No concerns | Very low |
| Gabapentin900 vs Pregabalin300  | -- | Some concerns | Low risk | No concerns | Major concerns | No concerns | No concerns | Very low |
| Gabapentin900 vs Pregabalin75   | -- | Some concerns | Low risk | No concerns | Major concerns | No concerns | No concerns | Very low |
| Pregabalin150 vs Pregabalin300  | -- | Some concerns | Low risk | No concerns | Major concerns | No concerns | No concerns | Very low |
| Pregabalin300 vs Pregabalin75   | -- | No concerns   | Low risk | No concerns | Major concerns | No concerns | No concerns | Low      |

**eTable 1.** Electronic Database Search Strategy**OVID**

Database(s): **Ovid MEDLINE(R) 1946 to Present and Epub Ahead of Print, In-Process & Other Non-Indexed Citations and Ovid MEDLINE(R) Daily, EBM Reviews - Cochrane Central Register of Controlled Trials July 2021, EBM Reviews - Cochrane Database of Systematic Reviews 2005 to August 25, 2021, Embase 1974 to 2021 August 27**

Search Strategy:

| #  | Searches                                                                                                                                                                                                                                                                                                                                                                                                                                                                                                                                                         |
|----|------------------------------------------------------------------------------------------------------------------------------------------------------------------------------------------------------------------------------------------------------------------------------------------------------------------------------------------------------------------------------------------------------------------------------------------------------------------------------------------------------------------------------------------------------------------|
| 1  | exp Spinal Fusion/                                                                                                                                                                                                                                                                                                                                                                                                                                                                                                                                               |
| 2  | exp Spine/su                                                                                                                                                                                                                                                                                                                                                                                                                                                                                                                                                     |
| 3  | ((spine or spinal or lumbar or lumbosacral or cervico* or cervical or thoracic or thoracolumbar or occipitocervical or "occipito-cervical" or occipitalcervical or "occipital-cervical" or atlantoaxial or "atlanto-axial" or occipitoatlantoaxial or "occipoto-atlantoaxial" or "craniovertebral junction" or subluxation or vertebr* or intervertebral or disc or discs or disk or disks or sacral or sacrum or "trans-sacr*") adj10 (fusion* or fused or fusing or fixation or decompression or surg* or operat* or arthrodesis or reconstruct*).ti,ab,hw,kw. |
| 4  | (dissectom* or diskectom* or laminectomy or spondylosyndesis).ti,ab,hw,kw.                                                                                                                                                                                                                                                                                                                                                                                                                                                                                       |
| 5  | exp Decompression, Surgical/                                                                                                                                                                                                                                                                                                                                                                                                                                                                                                                                     |
| 6  | spinal cord decompression/                                                                                                                                                                                                                                                                                                                                                                                                                                                                                                                                       |
| 7  | exp Diskectomy/                                                                                                                                                                                                                                                                                                                                                                                                                                                                                                                                                  |
| 8  | Pedicle Screws/ or screw*.ti.                                                                                                                                                                                                                                                                                                                                                                                                                                                                                                                                    |
| 9  | or/1-8                                                                                                                                                                                                                                                                                                                                                                                                                                                                                                                                                           |
| 10 | Pregabalin/                                                                                                                                                                                                                                                                                                                                                                                                                                                                                                                                                      |
| 11 | (pregabalin or lyrica).mp.                                                                                                                                                                                                                                                                                                                                                                                                                                                                                                                                       |
| 12 | 10 or 11                                                                                                                                                                                                                                                                                                                                                                                                                                                                                                                                                         |
| 13 | exp Pain, Postoperative/                                                                                                                                                                                                                                                                                                                                                                                                                                                                                                                                         |
| 14 | pain.ti. or (pain adj7 (after* or post* or surg* or operat*)).ti,ab.                                                                                                                                                                                                                                                                                                                                                                                                                                                                                             |
| 15 | 13 or 14                                                                                                                                                                                                                                                                                                                                                                                                                                                                                                                                                         |
| 16 | 9 and 12 and 15                                                                                                                                                                                                                                                                                                                                                                                                                                                                                                                                                  |
| 17 | (conference abstract or conference review or editorial or erratum or note or addresses or autobiography or bibliography or biography or blogs or comment or dictionary or directory or interactive tutorial or interview or lectures or legal cases or legislation or news or newspaper article or patient education handout or periodical index or portraits or published erratum or video-audio media or webcasts).mp. or conference abstract.st.                                                                                                              |
| 18 | 16 not 17                                                                                                                                                                                                                                                                                                                                                                                                                                                                                                                                                        |
| 19 | (exp animals/ or exp nonhuman/) not exp humans/                                                                                                                                                                                                                                                                                                                                                                                                                                                                                                                  |
| 20 | ((alpaca or alpacas or amphibian or amphibians or animal or animals or antelope or armadillo or armadillos or avian or baboon or baboons or beagle or beagles or bee or bees or bird or birds or bison or bovine or buffalo or buffaloes or buffalos or "c elegans" or "Caenorhabditis elegans" or camel or camels or canine or canines or carp or cats or cattle or chick or chicken or chickens or chicks or chimp or chimpanze or chimpanzees                                                                                                                 |

|    |                                                                                                                                                                                                                                                                                                                                                                                                                                                                                                                                                                                                                                                                                                                                                                                                                                                                                                                                                                                                                                                                                                                                                                                                                                                                                                                                                                                                                                                                                                                                                                                                            |
|----|------------------------------------------------------------------------------------------------------------------------------------------------------------------------------------------------------------------------------------------------------------------------------------------------------------------------------------------------------------------------------------------------------------------------------------------------------------------------------------------------------------------------------------------------------------------------------------------------------------------------------------------------------------------------------------------------------------------------------------------------------------------------------------------------------------------------------------------------------------------------------------------------------------------------------------------------------------------------------------------------------------------------------------------------------------------------------------------------------------------------------------------------------------------------------------------------------------------------------------------------------------------------------------------------------------------------------------------------------------------------------------------------------------------------------------------------------------------------------------------------------------------------------------------------------------------------------------------------------------|
|    | <p>or chimps or cow or cows or "D melanogaster" or "dairy calf" or "dairy calves" or deer or dog or dogs or donkey or donkeys or drosophila or "Drosophila melanogaster" or duck or duckling or ducklings or ducks or equid or equids or equine or equines or feline or felines or ferret or ferrets or finch or finches or fish or flatworm or flatworms or fox or foxes or frog or frogs or "fruit flies" or "fruit fly" or "G mellonella" or "Galleria mellonella" or geese or gerbil or gerbils or goat or goats or goose or gorilla or gorillas or hamster or hamsters or hare or hares or heifer or heifers or horse or horses or insect or insects or jellyfish or kangaroo or kangaroos or kitten or kittens or lagomorph or lagomorphs or lamb or lambs or llama or llamas or macaque or macaques or macaw or macaws or marmoset or marmosets or mice or minipig or minipigs or mink or minks or monkey or monkeys or mouse or mule or mules or nematode or nematodes or octopus or octopuses or orangutan or "orang-utan" or orangutans or "orang-utans" or oxen or parrot or parrots or pig or pigeon or pigeons or piglet or piglets or pigs or porcine or primate or primates or quail or rabbit or rabbits or rat or rats or reptile or reptiles or rodent or rodents or ruminant or ruminants or salmon or sheep or shrimp or slug or slugs or swine or tamarin or tamarins or toad or toads or trout or urchin or urchins or vole or voles or waxworm or waxworms or worm or worms or xenopus or "zebra fish" or zebrafish) not (human or humans or patient or patients)).ti,ab,hw,kw.</p> |
| 21 | (rat or rats or mice or mouse or murine or pig or pigs or porcine or swine or dog or dogs).ti.                                                                                                                                                                                                                                                                                                                                                                                                                                                                                                                                                                                                                                                                                                                                                                                                                                                                                                                                                                                                                                                                                                                                                                                                                                                                                                                                                                                                                                                                                                             |
| 22 | or/19-21                                                                                                                                                                                                                                                                                                                                                                                                                                                                                                                                                                                                                                                                                                                                                                                                                                                                                                                                                                                                                                                                                                                                                                                                                                                                                                                                                                                                                                                                                                                                                                                                   |
| 23 | 18 not 22                                                                                                                                                                                                                                                                                                                                                                                                                                                                                                                                                                                                                                                                                                                                                                                                                                                                                                                                                                                                                                                                                                                                                                                                                                                                                                                                                                                                                                                                                                                                                                                                  |
| 24 | remove duplicates from 23                                                                                                                                                                                                                                                                                                                                                                                                                                                                                                                                                                                                                                                                                                                                                                                                                                                                                                                                                                                                                                                                                                                                                                                                                                                                                                                                                                                                                                                                                                                                                                                  |

## SCOPUS

|   |                                                                                                                                                                                                                                                                                                                                                                                                                                                                                                                                                                        |
|---|------------------------------------------------------------------------------------------------------------------------------------------------------------------------------------------------------------------------------------------------------------------------------------------------------------------------------------------------------------------------------------------------------------------------------------------------------------------------------------------------------------------------------------------------------------------------|
| 1 | TITLE-ABS-KEY ( ( spine OR spinal OR lumbar OR lumbosacral OR cervico* OR cervical OR thoracic OR thoracolumbar OR occipitocervical OR "occipito-cervical" OR occipitalcervical OR "occipital-cervical" OR atlantoaxial OR "atlanto-axial" OR occipitoatlantoaxial OR "occipoto-atlantoaxial" OR "craniovertebral junction" OR subluxation OR vertebr* OR intervertebral OR disc OR discs OR disk OR disks OR sacral OR sacrum OR "trans-sacr*" ) W/8 ( fusion* OR fused OR fusing OR fixation OR decompression OR surg* OR operat* OR arthrodesis OR reconstruct* ) ) |
| 2 | TITLE-ABS-KEY (pregabalin or lyrica)                                                                                                                                                                                                                                                                                                                                                                                                                                                                                                                                   |
| 3 | TITLE (pain) or TITLE-ABS-KEY (pain W/7 (after* or post* or surg* or operat*))                                                                                                                                                                                                                                                                                                                                                                                                                                                                                         |
| 4 | 1 and 2 and 3                                                                                                                                                                                                                                                                                                                                                                                                                                                                                                                                                          |
| 5 | 4 AND ( LIMIT-TO ( DOCTYPE,"ar" ) ) AND ( LIMIT-TO ( LANGUAGE,"English" ) )                                                                                                                                                                                                                                                                                                                                                                                                                                                                                            |
| 6 | 5 not INDEX(embase) OR INDEX(medline) OR PMID(0* OR 1* OR 2* OR 3* OR 4* OR 5* OR 6* OR 7* OR 8* OR 9*)                                                                                                                                                                                                                                                                                                                                                                                                                                                                |

**eTable 2** Excluded Studies With Reasons

| Author        | Study Name                                                                                                                                                                                                                    | Reasons for exclusion   |
|---------------|-------------------------------------------------------------------------------------------------------------------------------------------------------------------------------------------------------------------------------|-------------------------|
| Reuben 2006   | The analgesic efficacy of celecoxib, pregabalin, and their combination for spinal fusion surgery                                                                                                                              | Retracted article       |
| ElShal 2010   | Pregabalin versus ketorolac for postoperative analgesia after lumbar laminectomy (a comparative randomized controlled study)                                                                                                  | Only abstract available |
| Yu 2013       | Gabapentin and pregabalin in the management of postoperative pain after lumbar spinal surgery: a systematic review and meta-analysis                                                                                          | Wrong study design      |
| Garcia 2013   | A multimodal approach for postoperative pain management after lumbar decompression surgery: a prospective, randomized study                                                                                                   | Wrong intervention      |
| Dolgun 2014   | Gabapentin versus pregabalin in relieving early post-surgical neuropathic pain in patients after lumbar disc herniation surgery: a prospective clinical trial                                                                 | No accessible data      |
| Lam 2015      | Efficacy of pregabalin in acute postoperative pain under different surgical categories a meta-analysis                                                                                                                        | Wrong study design      |
| Feng 2016     | Preoperative single dose of pregabalin alleviates postoperative pain: Systematic review and meta-analysis                                                                                                                     | Wrong study design      |
| Ko 2016       | The effectiveness of oral corticosteroids for management of lumbar radiating pain: randomized, controlled trial study                                                                                                         | Wrong population        |
| Canos 2016    | Preventive Analgesia with Pregabalin in Neuropathic Pain from "Failed Back Surgery Syndrome": Assessment of Sleep Quality and Disability                                                                                      | No accessible data      |
| Hirai 2016    | Pregabalin versus acetaminophen for a treatment of chronic neuropathic pain on extremities after cervical surgery: a prospective randomized, open-label preliminary study                                                     | No accessible data      |
| Kim 2016      | Preemptive multimodal analgesia for postoperative pain management after lumbar fusion surgery: a randomized controlled trial                                                                                                  | Wrong population        |
| Fujita 2016   | A randomized placebo-controlled study of preoperative pregabalin for postoperative analgesia in patients with spinal surgery                                                                                                  | No accessible data      |
| Liu 2017      | A meta-analysis of the preoperative use of gabapentinoids for the treatment of acute postoperative pain following spinal surgery                                                                                              | Wrong study design      |
| Jiang 2017    | Preoperative use of pregabalin for acute pain in spine surgery: A meta-analysis of randomized controlled trials                                                                                                               | Wrong study design      |
| Pinar 2017    | Effects of Addition of Preoperative Intravenous Ibuprofen to Pregabalin on Postoperative Pain in Posterior Lumbar Interbody Fusion Surgery                                                                                    | Wrong intervention      |
| Helenius 2018 | Preoperative pregabalin has no effect on intraoperative neurophysiological monitoring in adolescents undergoing posterior spinal fusion for spinal deformities: a double-blind, randomized, placebo-controlled clinical trial | No accessible data      |
| Omara 2019    | The Effect Of The Use Of Pre-Emptive Oral Pregabalin On The Postoperative Spinal Analgesia In Patients Presented For Orthopedic Surgeries: Randomized Controlled Trial                                                        | Wrong population        |

|                       |                                                                                                                                                                                                                       |                    |
|-----------------------|-----------------------------------------------------------------------------------------------------------------------------------------------------------------------------------------------------------------------|--------------------|
| McEntarfer 2019       | Multimodal Analgesia for Spinal Surgery - What Is the Gold Standard?                                                                                                                                                  | Wrong study design |
| Trzcinski 2019        | Use of Gabapentin in Posterior Spinal Fusion is Associated with Decreased Postoperative Pain and Opioid Use in Children and Adolescents                                                                               | No accessible data |
| Helenius 2020         | Preemptive Pregabalin in Children and Adolescents Undergoing Posterior Instrumented Spinal Fusion: A Double-Blinded, Placebo-Controlled, Randomized Clinical Trial                                                    | No accessible data |
| Ntalouka 2021         | Multimodal Analgesia in Spine Surgery: An Umbrella Review                                                                                                                                                             | Wrong study design |
| Helenius 2021         | Pregabalin and Persistent Postoperative Pain Following Posterior Spinal Fusion in Children and Adolescents: A Randomized Clinical Trial                                                                               | No accessible data |
| Bilgin 2021           | Post-operative pain management for single-level lumbar disc herniation surgery: A comparison of betamethasone, ibuprofen, and pregabalin                                                                              | No accessible data |
| NCT01168531 2010      | The Effect of Pregabalin and Dexamethasone on Acute and Chronic Pain After Lumbar Spinal Surgery                                                                                                                      | No results posted  |
| NCT02120703 2014      | Pregabalin Compared to Gabapentin for Pain Control in Lumbar Disc Surgery                                                                                                                                             | No results posted  |
| TCTR20160729 003      | The effect of preoperative pregabalin administration in postoperative pain control after laminectomy and instrumented fusion in degenerative lumbar spine disease: a randomized double-blind placebo controlled study | Only abstract      |
| UMIN000028 475        | The efficacy of duloxetine for neuropathic pain a comparison of pregabalin                                                                                                                                            | No results posted  |
| IRCT2017030 132832N1  | Evaluation the effect of two different doses of pregabalin before surgery on postoperative pain after lumbar disc surgery                                                                                             | No results posted  |
| IRCT2019071 9044276N1 | The comparison of effect of pregabalin and duloxetine on post-op pain                                                                                                                                                 | No results posted  |
| Irct201907030 44091N1 | Effects of magnesium sulfate and pregabalin on postoperative pain in posterior lumbar spinal fusion surgery                                                                                                           | Wrong intervention |
| ChiCTR20000 35554     | The effects of pregabalin versus gabapentin combined with NSIADs on the pain of spinal surgery: a randomized controlled trial                                                                                         | No results posted  |
| ChiCTR20000 31236     | Effect of local infiltration using ropivacaine combined with celebrex and pregabalin on the pain control of spinal surgery                                                                                            | Wrong intervention |
| ChiCTR21000 42109     | Clinical randomized controlled trial of multimodal analgesia (MMA) and patient controlled analgesia (PCA) in Oblique Lumbar Interbody Fusion                                                                          | Wrong intervention |

**eTable 3** Descriptions and Demo of the Included Studies

| Study (Author, year)      | Preexisting neuropathic pain | NSAID use before study            | Gabapentinoid use before study | Duration of gabapentinoid use for study         | Postoperative VAS assessment timing (hrs) | Postoperative opioid consumption recording timing (hrs) | Postoperative Complication assessment timing(hrs) | Comorbidities | Co-mediations                        | Other outcomes                                                                       |
|---------------------------|------------------------------|-----------------------------------|--------------------------------|-------------------------------------------------|-------------------------------------------|---------------------------------------------------------|---------------------------------------------------|---------------|--------------------------------------|--------------------------------------------------------------------------------------|
| Pandey et al, 2004        | Not mentioned                | No (within 48 hrs before surgery) | Not mentioned                  | 2 hrs before surgery                            | *0-6,6-12, 12-18, 18-24                   | *Within 24                                              | *Within 24                                        | NA            | NA                                   | Fatigue, light headedness                                                            |
| Turan et al, 2004         | Not mentioned                | No                                | No                             | 1 hr before surgery                             | *1,2,4,6,12,24                            | 1,2,4,6,12,24,*during hospitalization                   | *Within 24                                        | NA            | NA                                   | Somnolence, diarrhea, pruritis, urinary retention, constipation                      |
| Pandey et al, 2005        | Yes                          | No (within 24 hrs before surgery) | Not mentioned                  | 2 hrs before surgery                            | *6,12,18,24                               | *Within 24                                              | *Within 24                                        | NA            | NA                                   | Respiratory depression, light headedness, lack of concentration, feeling on a “high” |
| Radhakrishnan et al, 2005 | Not mentioned                | No (within 24 hrs before surgery) | Not mentioned                  | at night before surgery and 2hrs before surgery | *2,4,6,8                                  | *>8                                                     | *during hospitalization                           | NA            | NA                                   | Urinary retention, dry mouth, somnolence, pruritis, headache                         |
| Burke et al, 2010         | Yes                          | Not mentioned                     | Not mentioned                  | 1.5 hr before surgery, 12                       | *24                                       | Not mentioned                                           | *24                                               | Smoker        | Paracetamol, diclofenac, bupivacaine | McGill pain questionnaire, Roland Morris                                             |



|                       |               |                                                                       |                                    |                                                   |                     |                        |                         |    |            |                                                                                   |
|-----------------------|---------------|-----------------------------------------------------------------------|------------------------------------|---------------------------------------------------|---------------------|------------------------|-------------------------|----|------------|-----------------------------------------------------------------------------------|
|                       |               |                                                                       |                                    | and 24 hrs after surgery                          |                     |                        |                         |    |            | disability questionnaire. Prolo score, Short Form 36                              |
| Hegarty et al, 2011   | Yes           | Yes, paracetamol 1000 mg every 6 hours                                | No (within 2 weeks before surgery) | 1 hr before surgery                               | 4,8,12,24           | Within 24              | *Within 24              | NA | Diclofenac | Somnolence, lightheadedness, visual disturbance                                   |
| Khan et al, 2011      | Not mentioned | No (within 24 hrs before surgery)                                     | No (within 24 hrs before surgery)  | 2 hrs before surgery                              | *0-4,4-8,8-12,12-24 | *Within 24             | *during hospitalization | NA | NA         | Drowsiness                                                                        |
| Kim et al, 2011       | Not mentioned | No (within 48rs before surgery)                                       | No (within 48rs before surgery)    | 1 hr before surgery and 12 hrs after surgery      | *1-6,6-24,24-48     | 1-6,6-24,-24-48        | *during hospitalization | NA | NA         | Incidence of pain rescues, satisfaction score, sedation, headache, blurred vision |
| Spreng et al, 2011    | Not mentioned | Yes, paracetamol 1000 mg for weight < 60kg; 1500 mg for weight >60 kg | Not mentioned                      | 1 hr before surgery                               | 0.5,1,2,3,4,24      | 0.5,1,2,3,4,24         | *Within 24              | NA | NA         | Sedation, pruritus, urinary retention, respiratory depression, headache           |
| Ozgenicil et al, 2011 | Not mentioned | No                                                                    | No                                 | 2 hrs before surgery, 10 and 22 hrs after surgery | *1,2,4,6,12,24      | 1,2,4,6,12, *within 24 | *during hospitalization | NA | NA         | Satisfaction with pain medication, numeric sedation score, somnolence,            |

|                        |               |               |    |                                                                   |                                            |                 |                         |                                                   |            |                                                                                                                                                         |
|------------------------|---------------|---------------|----|-------------------------------------------------------------------|--------------------------------------------|-----------------|-------------------------|---------------------------------------------------|------------|---------------------------------------------------------------------------------------------------------------------------------------------------------|
|                        |               |               |    |                                                                   |                                            |                 |                         |                                                   |            | headache, blurred vision, urinary retention, pruritus, shivering                                                                                        |
| Gianesello et al, 2012 | Not mentioned | Not mentioned | No | 1 hr before surgery and twice a day after surgery for 2 days      | 1,4,8,12,24,48, 3 months, 1year            | 1,4,8,12,24,*48 | *during hospitalization | NA                                                | NA         | Pruritus, sedation, respiratory depression, hypotension, headache, constipation, diarrhea, peripheral edema, dry mouth, blurred vision, quality of Life |
| Choi et al, 2013       | Yes           | Not mentioned | No | 1hr before surgery and every 12 hrs after surgery (total 8 doses) | *12,24,48,72                               | Not mentioned   | *0-12,12-24,24-48,48-72 | NA                                                | NA         | Incidence of pain rescue, back pain, leg pain, daily activities                                                                                         |
| Kumar et al, 2013      | Not mentioned | Not mentioned | No | 1hr before surgery                                                | *1,2,4,6                                   | *6              | *during hospitalization | NA                                                | Diclofenac | Anxiety score, sedation score, drowsiness                                                                                                               |
| Khurana et al, 2014    | Yes           | Not mentioned | No | 1hr before surgery and every 8 hours                              | 3,6,12,24,36,48, 72,7days, 21days,3 months | Not mentioned   | *during hospitalization | Diabetes, hypertension, alcoholic, smoker, others | NA         | Prolo score, Oswestry disability index score, sedation,                                                                                                 |

|                        |               |                                  |                                   |                                                                                        |                       |                                  |                         |                                      |             |                                                              |
|------------------------|---------------|----------------------------------|-----------------------------------|----------------------------------------------------------------------------------------|-----------------------|----------------------------------|-------------------------|--------------------------------------|-------------|--------------------------------------------------------------|
|                        |               |                                  |                                   | for 7 days after surgery                                                               |                       |                                  |                         |                                      |             | vertigo, numbness                                            |
| Zarei et al, 2016      | Yes           | Yes                              | No(within 2 weeks before surgery) | 8hrs before surgery and every 12 hours for 14 days after surgery for 2 days or 14 days | *4,8,12,24            | Not mentioned                    | Within 24               | Smoker                               | NA          | NA                                                           |
| Vasigh et al, 2016     | Yes           | No                               | Not mentioned                     | 2hrs before surgery and 6 hours after surgery                                          | *2,4,6,8,12,24        | *Not mentioned                   | *during hospitalization | NA                                   | NA          | Shivering, drowsiness, pruritus, urinary retention, headache |
| Qadeer et al, 2017     | Not mentioned | Not mentioned                    | No                                | twice daily for a week before surgery                                                  | *24, 1 week           | Not mentioned                    | Not mentioned           | Hypertension, diabetes, COPD, others | NA          | NA                                                           |
| Yadav et al, 2018      | Not mentioned | No (within 24hrs before surgery) | No                                | 2hrs before surgery                                                                    | Not mentioned         | *during hospitalization          | Not mentioned           | NA                                   | NA          | Mean arterial blood pressure, heart rate, bispectral index   |
| Urban et al, 2018      | Yes           | Not mentioned                    | No                                | 1hr before surgery and twice daily for 14 days after surgery                           | *24,48,72             | 0-6,7-12,13-18,19-24,25-48,49-72 | *24,48,72               | NA                                   | NA          | Sedation, hospital stay                                      |
| Altiparmak et al, 2018 | Not mentioned | No                               | No                                | 1hr before surgery, 12th and 24th hr after surgery                                     | 1 min, 0.5, 1,2,24,48 | Not mentioned                    | *during hospitalization | NA                                   | Paracetamol | Montreal Cognitive Assessment, delay of first                |

|                     |               |                                  |                                   |                     |                                     |                         |                         |                                                                                                        |                                                     |                                                                                                                               |
|---------------------|---------------|----------------------------------|-----------------------------------|---------------------|-------------------------------------|-------------------------|-------------------------|--------------------------------------------------------------------------------------------------------|-----------------------------------------------------|-------------------------------------------------------------------------------------------------------------------------------|
|                     |               |                                  |                                   |                     |                                     |                         |                         |                                                                                                        |                                                     | analgesic request, incidence of pain rescue, hypotension, bradycardia, allergy, itching                                       |
| Routray et al, 2018 | Not mentioned | Not mentioned                    | Not mentioned                     | 1hr before surgery  | 1,2,4,6,8,12,16, 20,24              | within 24               | *during hospitalization | NA                                                                                                     | Paracetamol                                         | Sedation, time to first dose of rescue analgesia, incidence of pain rescues,                                                  |
| Raja et al, 2019    | Not mentioned | No(within 24 hrs before surgery) | Not mentioned                     | 4hrs before surgery | 4,8,12,16,20,24, 28,32,36,40,44, 48 | *during hospitalization | *during hospitalization | NA                                                                                                     | Paracetamol, ketorolac                              | Dry mouth, difficulty in urination, constipation, hospital stay, - North American Spine Society satisfaction scale            |
| Momon et al, 2019   | Not mentioned | Not mentioned                    | No (within 48 hrs before surgery) | 1 hr before surgery | During hospitalization, 6 months    | *within 48              | *During hospitalization | Hypertension, coronary disease, cardiac insufficiency, arteritis, thromboembolic disease, sleep apnea, | Acetaminophen, nonsteroidal anti-inflammatory drugs | Hospital stay, time to first ambulation, persistent pain, pain intensity, regular opioid intake, neuropathic pain, quality of |

|                  |               |               |    |                      |                             |                      |                        |                                                                                                                                                                                                                            |           |                                                                                                                                                                                                           |
|------------------|---------------|---------------|----|----------------------|-----------------------------|----------------------|------------------------|----------------------------------------------------------------------------------------------------------------------------------------------------------------------------------------------------------------------------|-----------|-----------------------------------------------------------------------------------------------------------------------------------------------------------------------------------------------------------|
|                  |               |               |    |                      |                             |                      |                        | smoker, dyspnea, asthma, gastroesophageal disease, viral hepatitis, regular alcohol intake, diabetes, dyslipidemia, hypothyroidism, allergy, cancer, lithiasis, migraine, anxiety, depression, cerebral disease, infection |           | first attempt to stand up, sedation, urinary retention, hypotension, hypertension, sleep disturbance, headache, diarrhea, hyperglycemia, gastralgia, hyperthermia, respiratory disturbance, radiculopathy |
| Bala et al, 2019 | Not mentioned | Not mentioned | No | 1.5hr before surgery | *1,2,4,6,1,24               | *within 24           | During hospitalization | NA                                                                                                                                                                                                                         | NA        | Recovery profile, Ramsay sedation scale score                                                                                                                                                             |
| Kien et al, 2019 | Not mentioned | Not mentioned | No | 2hrs before surgery  | *0.25,0.5,1,4,8,16,24,36,48 | Within 24,*within 48 | During hospitalization | NA                                                                                                                                                                                                                         | Celecoxib | Mean arterial blood pressure, heart rate, respiratory rate, SpO <sub>2</sub> , sedation score, time to                                                                                                    |

|                                                                               |               |               |               |                                                             |                 |               |                         |    |                        |                                                                                      |
|-------------------------------------------------------------------------------|---------------|---------------|---------------|-------------------------------------------------------------|-----------------|---------------|-------------------------|----|------------------------|--------------------------------------------------------------------------------------|
|                                                                               |               |               |               |                                                             |                 |               |                         |    |                        | first dose of rescue analgesia                                                       |
| Zhang et al, 2021                                                             | Not mentioned | Not mentioned | Not mentioned | 2hrs before surgery twice daily for 7 days after surgery    | *2,12,24,72,120 | Not mentioned | *During hospitalization | NA | Celebrex, ropivacaine  | Walking time, hospital stay, fever, infection, urination disorder, secondary surgery |
| Baloch et al, 2021                                                            | Yes           | Not mentioned | Not mentioned | Twice daily on preoperative day till one week after surgery | *1 week         | Not mentioned | Not mentioned           | NA | Paracetamol, ketorolac | Roland-Morris disability scale                                                       |
| NSAIDs: Non-steroidal anti-inflammatory drugs<br>*: used for further analysis |               |               |               |                                                             |                 |               |                         |    |                        |                                                                                      |

**eTable 4:** Assessment of Inconsistency With Design-by-Treatment Interaction Models

|                    | Chi-Square | P value for test of global inconsistency |
|--------------------|------------|------------------------------------------|
| VAS                | 7.59       | 0.6684                                   |
| Opioid Consumption | 3.70       | 0.9883                                   |
| Nausea             | 6.69       | 0.9461                                   |
| Vomit              | 7.83       | 0.8121                                   |
| Dizziness          | 2.67       | 0.9536                                   |

**eTable 5** Meta-Regression of Covariates for Outcomes

| Outcomes                | Covariates                      | P value |
|-------------------------|---------------------------------|---------|
| VAS                     | Co-medication                   | 0.6743  |
|                         | Funding                         | 0.7427  |
|                         | Postoperative gabapentinoid use | 0.3004  |
|                         | Preexisting neuropathic pain    | 0.4208  |
| Opioid Consumption      | Co-medication                   | 0.5127  |
|                         | Funding                         | 0.9039  |
|                         | Postoperative gabapentinoid use | 0.5182  |
|                         | Preexisting neuropathic pain    | 0.0566  |
| Nausea                  | Co-medication                   | 0.9283  |
|                         | Funding                         | 0.0148* |
|                         | Postoperative gabapentinoid use | 0.0513  |
|                         | Preexisting neuropathic pain    | 0.4762  |
| Vomit                   | Co-medication                   | 0.8106  |
|                         | Funding                         | 0.2638  |
|                         | Postoperative gabapentinoid use | 0.3476  |
|                         | Preexisting neuropathic pain    | 0.6426  |
| Dizziness               | Co-medication                   | 0.7637  |
|                         | Funding                         | 0.9878  |
|                         | Postoperative gabapentinoid use | 0.8308  |
|                         | Preexisting neuropathic pain    | 0.7637  |
| *significant difference |                                 |         |

**eTable 6 SUCRA, PrBest, and Mean Rank of Different Dosages of Gabapentin and Pregabalin for Patients Undergoing Spinal Surgery.**

| <b>A</b>                  |       |        |          | <b>B</b>                      |       |        |          |
|---------------------------|-------|--------|----------|-------------------------------|-------|--------|----------|
| Treatment( <b>Vomit</b> ) | SUCRA | PrBest | MeanRank | Treatment( <b>Dizziness</b> ) | SUCRA | PrBest | MeanRank |
| Gabapentin900mg           | 70.8  | 35.4   | 3.3      | Gabapentin300mg               | 77.9  | 60.6   | 2.5      |
| Pregabalin150mg           | 69.9  | 22.2   | 3.4      | Pregabalin150mg               | 64.7  | 17.5   | 3.5      |
| Gabapentin1200mg          | 63.0  | 10.4   | 4.0      | Placebo                       | 63.2  | 2.7    | 3.6      |
| Gabapentin600mg           | 62.4  | 6.5    | 4.0      | Pregabalin300mg               | 53.8  | 2.8    | 4.2      |
| Pregabalin300mg           | 49.2  | 2.1    | 5.1      | Gabapentin900mg               | 49.1  | 12.8   | 4.6      |
| Pregabalin75mg            | 48.7  | 5.7    | 5.1      | Gabapentin600mg               | 34.0  | 1.3    | 5.6      |
| Gabapentin800mg           | 45.3  | 16.4   | 5.4      | Gabapentin1200mg              | 30.2  | 0.6    | 5.9      |
| Gabapentin300mg           | 27.1  | 1.3    | 6.8      | Pregabalin75mg                | 27.3  | 1.7    | 6.1      |
| Placebo                   | 13.5  | 0.0    | 7.9      |                               |       |        |          |



## Sensitivity analysis for nausea (studies without funding)

eFigure 10: Network Graph for Nausea Without Funding

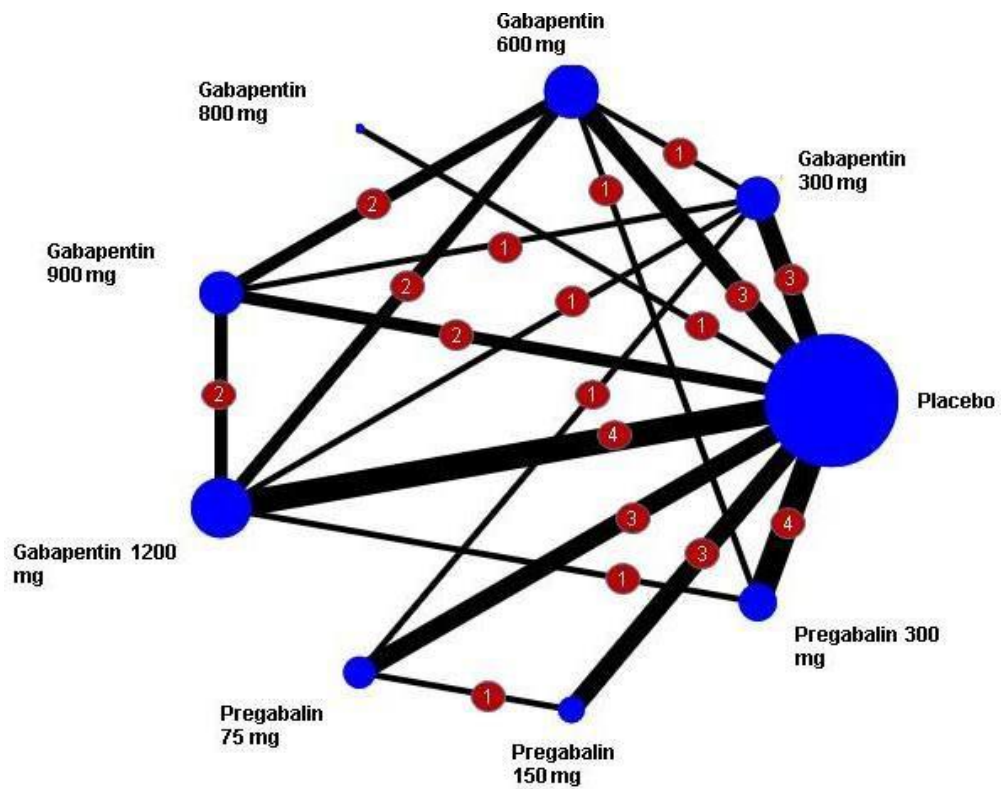

**eFigure 11: Network Meta-Analysis League Tables for Nausea Without Funding**

(In the left lower half, odds ratio lower than 1 favor the row-defining treatment)

|                      |                      |                      |                     |                      |                      |                      |                      |                       |
|----------------------|----------------------|----------------------|---------------------|----------------------|----------------------|----------------------|----------------------|-----------------------|
| <b>Pregabalin75</b>  |                      |                      |                     |                      |                      |                      |                      |                       |
| 3.00<br>(0.97,9.31)  | <b>Pregabalin300</b> |                      |                     |                      |                      |                      |                      |                       |
| 3.10<br>(0.90,10.64) | 1.03<br>(0.32,3.36)  | <b>Pregabalin150</b> |                     |                      |                      |                      |                      |                       |
| 1.72<br>(0.71,4.20)  | 0.57<br>(0.28,1.16)  | 0.56<br>(0.21,1.44)  | <b>Placebo</b>      |                      |                      |                      |                      |                       |
| 2.05<br>(0.42,10.02) | 0.68<br>(0.16,2.90)  | 0.66<br>(0.13,3.37)  | 1.19<br>(0.32,4.47) | <b>Gabapentin900</b> |                      |                      |                      |                       |
| 1.72<br>(0.37,8.10)  | 0.57<br>(0.14,2.44)  | 0.56<br>(0.11,2.71)  | 1.00<br>(0.28,3.54) | 0.84<br>(0.13,5.25)  | <b>Gabapentin800</b> |                      |                      |                       |
| 1.58<br>(0.42,5.97)  | 0.53<br>(0.17,1.61)  | 0.51<br>(0.13,2.02)  | 0.92<br>(0.34,2.48) | 0.77<br>(0.19,3.07)  | 0.92<br>(0.18,4.59)  | <b>Gabapentin600</b> |                      |                       |
| 2.41<br>(0.72,8.09)  | 0.80<br>(0.23,2.83)  | 0.78<br>(0.19,3.17)  | 1.40<br>(0.48,4.03) | 1.18<br>(0.22,6.15)  | 1.40<br>(0.27,7.28)  | 1.53<br>(0.37,6.33)  | <b>Gabapentin300</b> |                       |
| 1.63<br>(0.52,5.07)  | 0.54<br>(0.22,1.31)  | 0.52<br>(0.16,1.72)  | 0.94<br>(0.46,1.93) | 0.79<br>(0.21,3.07)  | 0.94<br>(0.22,4.04)  | 1.03<br>(0.35,3.05)  | 0.68<br>(0.19,2.36)  | <b>Gabapentin1200</b> |

**eFigure 12: Rank Plot for Nausea Without Funding**

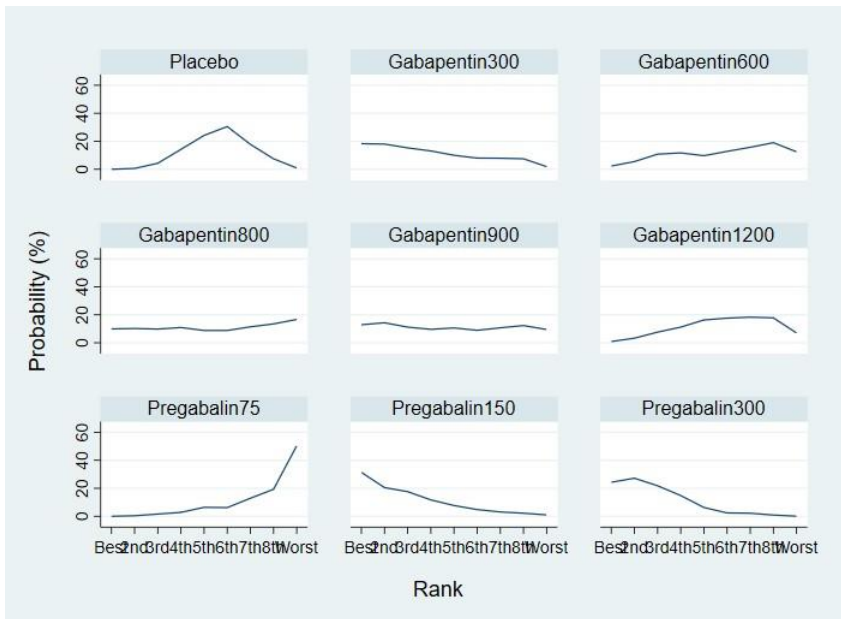

**eFigure 13: Forest Plot of Network Meta-Analysis Results for Nausea Without Funding (Placebo as Reference)**

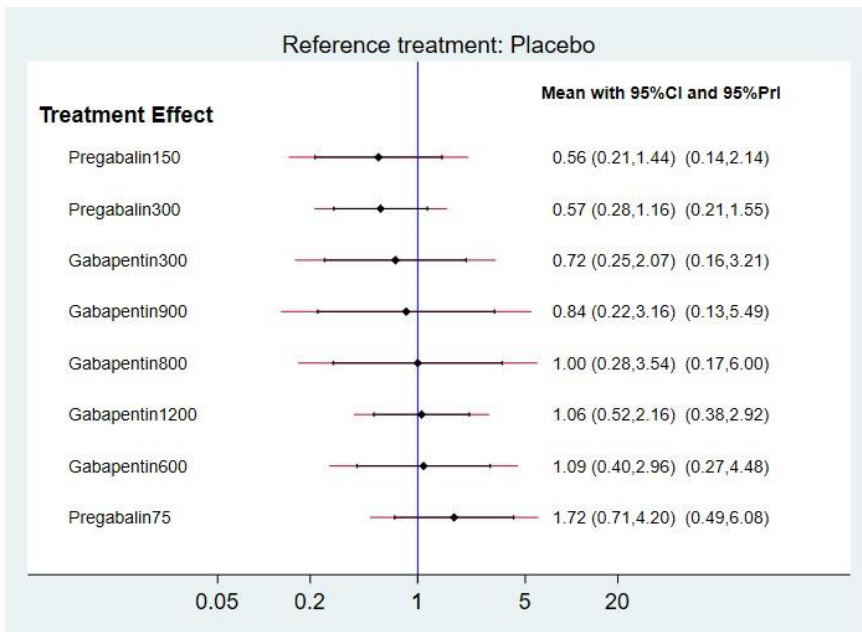

**eFigure 14: Forest Plot of Pairwise Comparison for Nausea Without Funding**

(A: placebo, B: Gabapentin 300mg, C: Gabapentin 600 mg, D: Gabapentin 800mg, E: Gabapentin 900mg, F: Gabapentin 1200mg, G: pregabalin 75mg, H: pregabalin 150mg, I: pregabalin 300mg)

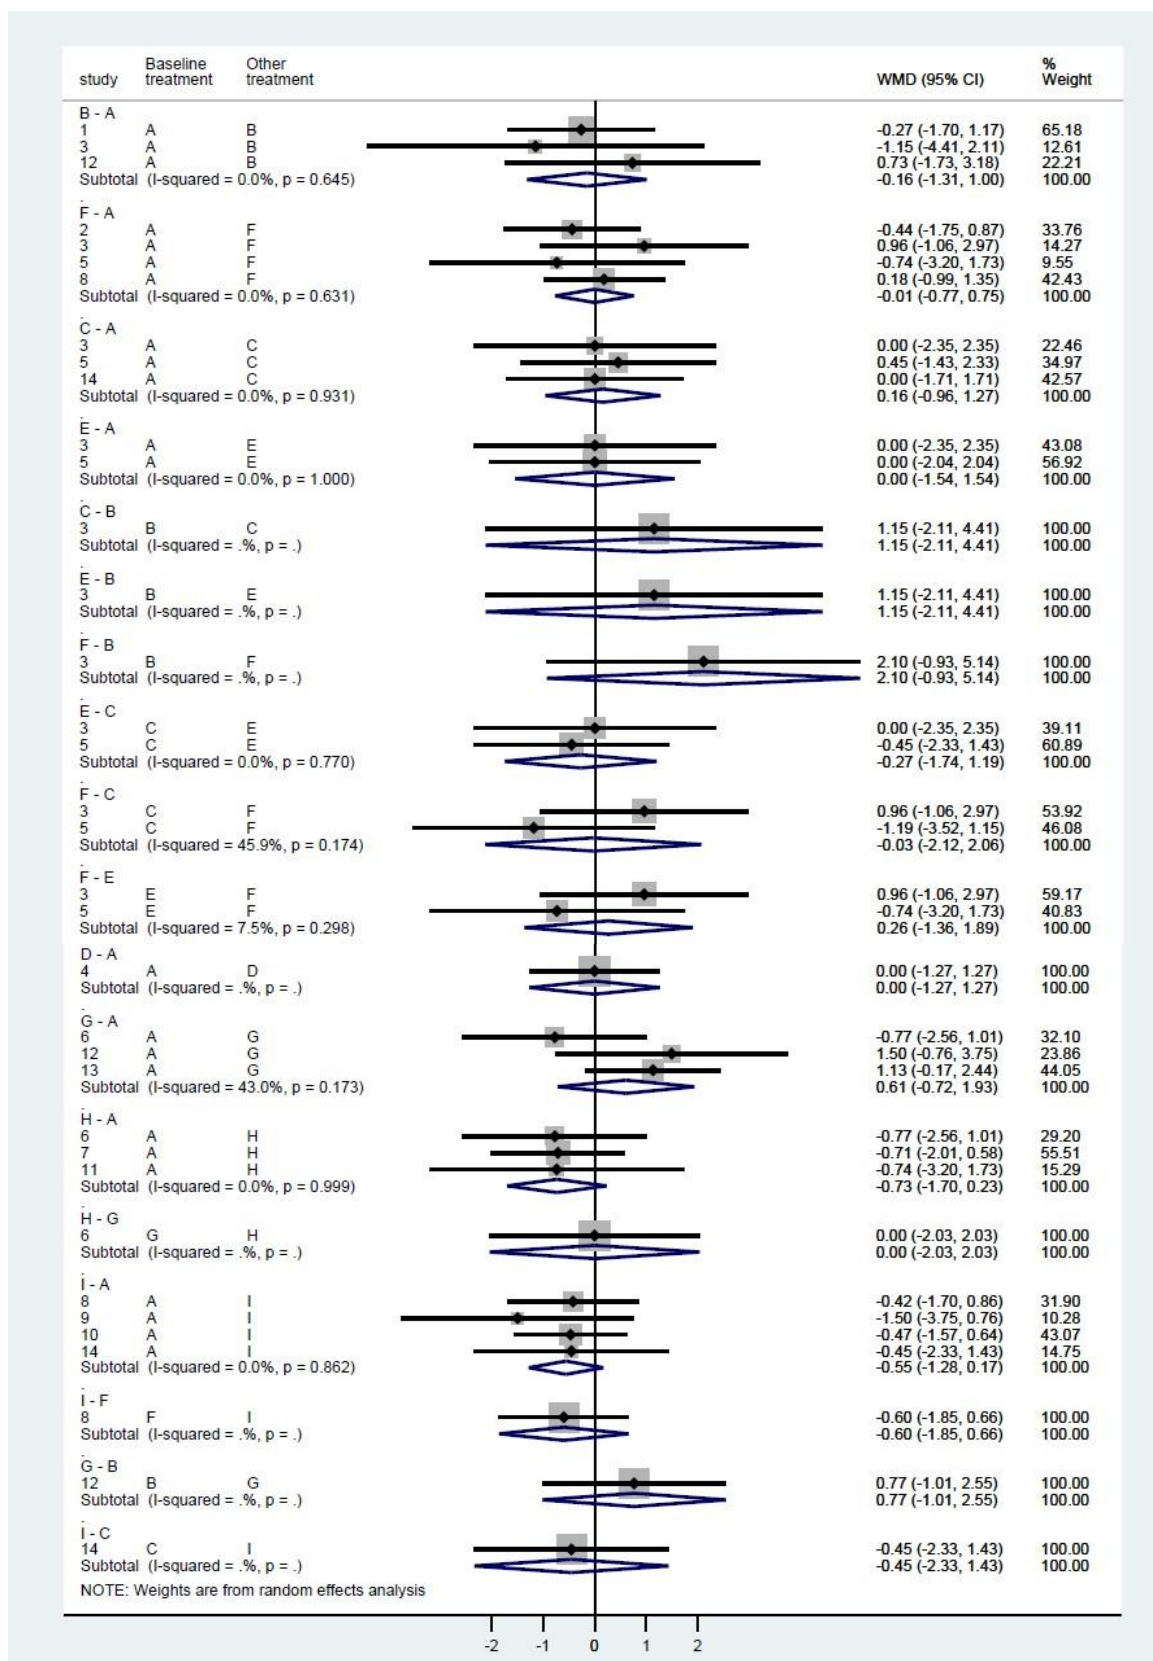

**eFigure 15: Publication Bias: Funnel Plot for Nausea Without Funding**

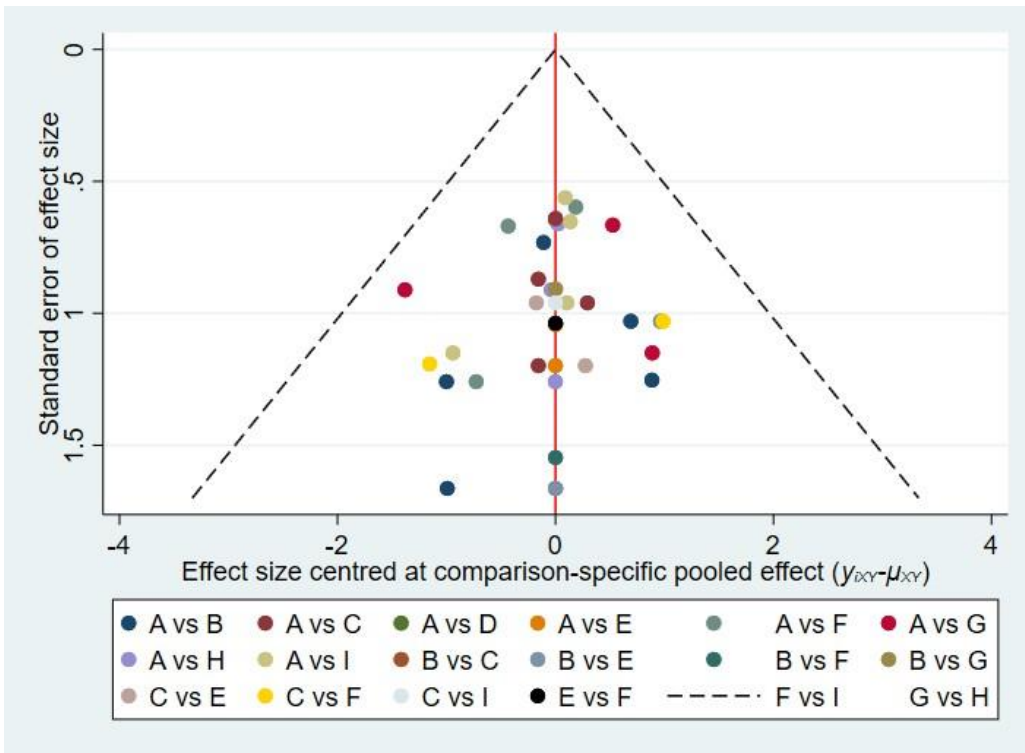

**eFigure 16: Publication Bias: The Egger Test for Nausea Without Funding**

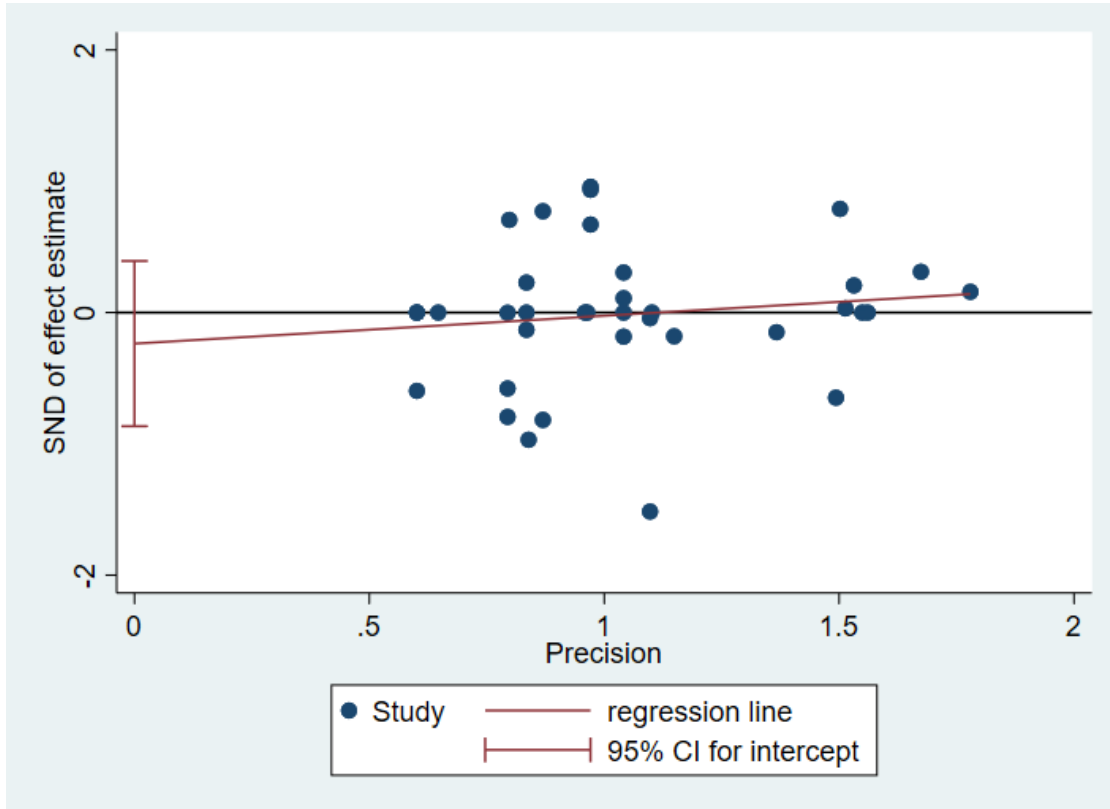

**eFigure 17: CINeMA for Nausea Without Funding**

| Comparison                      | Number of Studies | Within-study bias | Reporting bias | Indirectness | Imprecision    | Heterogeneity | Incoherence | Confidence rating |
|---------------------------------|-------------------|-------------------|----------------|--------------|----------------|---------------|-------------|-------------------|
| Mixed evidence                  |                   |                   |                |              |                |               |             |                   |
| Gabapentin1200 vs Gabapentin300 | 1                 | Some concerns     | Low risk       | No concerns  | Major concerns | No concerns   | No concerns | Very low          |
| Gabapentin1200 vs Gabapentin600 | 2                 | Some concerns     | Low risk       | No concerns  | Major concerns | No concerns   | No concerns | Very low          |
| Gabapentin1200 vs Gabapentin900 | 2                 | Some concerns     | Low risk       | No concerns  | Major concerns | No concerns   | No concerns | Very low          |
| Gabapentin1200 vs Placebo       | 4                 | Some concerns     | Low risk       | No concerns  | Major concerns | No concerns   | No concerns | Very low          |
| Gabapentin1200 vs Pregabalin300 | 1                 | Some concerns     | Low risk       | No concerns  | Major concerns | No concerns   | No concerns | Very low          |
| Gabapentin300 vs Gabapentin600  | 1                 | Some concerns     | Low risk       | No concerns  | Major concerns | No concerns   | No concerns | Very low          |
| Gabapentin300 vs Gabapentin900  | 1                 | Some concerns     | Low risk       | No concerns  | Major concerns | No concerns   | No concerns | Very low          |
| Gabapentin300 vs Placebo        | 3                 | No concerns       | Low risk       | No concerns  | Major concerns | No concerns   | No concerns | Low               |
| Gabapentin300 vs Pregabalin75   | 1                 | Some concerns     | Low risk       | No concerns  | Major concerns | No concerns   | No concerns | Very low          |
| Gabapentin600 vs Gabapentin900  | 2                 | Some concerns     | Low risk       | No concerns  | Major concerns | No concerns   | No concerns | Very low          |
| Gabapentin600 vs Placebo        | 3                 | Some concerns     | Low risk       | No concerns  | Major concerns | No concerns   | No concerns | Very low          |
| Gabapentin600 vs Pregabalin300  | 1                 | Some concerns     | Low risk       | No concerns  | Major concerns | No concerns   | No concerns | Very low          |
| Gabapentin800 vs Placebo        | 1                 | No concerns       | Low risk       | No concerns  | Major concerns | No concerns   | No concerns | Low               |
| Gabapentin900 vs Placebo        | 2                 | Some concerns     | Low risk       | No concerns  | Major concerns | No concerns   | No concerns | Very low          |
| Placebo vs Pregabalin150        | 3                 | Some concerns     | Low risk       | No concerns  | Major concerns | No concerns   | No concerns | Very low          |
| Placebo vs Pregabalin300        | 4                 | No concerns       | Low risk       | No concerns  | Major concerns | No concerns   | No concerns | Low               |
| Placebo vs Pregabalin75         | 3                 | No concerns       | Low risk       | No concerns  | Major concerns | No concerns   | No concerns | Low               |
| Pregabalin150 vs Pregabalin75   | 1                 | No concerns       | Low risk       | No concerns  | Major concerns | No concerns   | No concerns | Low               |
| Indirect evidence               |                   |                   |                |              |                |               |             |                   |
| Gabapentin1200 vs Gabapentin800 | --                | No concerns       | Low risk       | No concerns  | Major concerns | No concerns   | No concerns | Low               |
| Gabapentin1200 vs Pregabalin150 | --                | Some concerns     | Low risk       | No concerns  | Major concerns | No concerns   | No concerns | Very low          |
| Gabapentin1200 vs Pregabalin75  | --                | No concerns       | Low risk       | No concerns  | Major concerns | No concerns   | No concerns | Low               |
| Gabapentin300 vs Gabapentin800  | --                | No concerns       | Low risk       | No concerns  | Major concerns | No concerns   | No concerns | Low               |
| Gabapentin300 vs Pregabalin150  | --                | No concerns       | Low risk       | No concerns  | Major concerns | No concerns   | No concerns | Low               |
| Gabapentin300 vs Pregabalin300  | --                | No concerns       | Low risk       | No concerns  | Major concerns | No concerns   | No concerns | Low               |
| Gabapentin600 vs Gabapentin800  | --                | Some concerns     | Low risk       | No concerns  | Major concerns | No concerns   | No concerns | Very low          |
| Gabapentin600 vs Pregabalin150  | --                | Some concerns     | Low risk       | No concerns  | Major concerns | No concerns   | No concerns | Very low          |
| Gabapentin600 vs Pregabalin75   | --                | Some concerns     | Low risk       | No concerns  | Major concerns | No concerns   | No concerns | Very low          |
| Gabapentin800 vs Gabapentin900  | --                | Some concerns     | Low risk       | No concerns  | Major concerns | No concerns   | No concerns | Very low          |
| Gabapentin800 vs Pregabalin150  | --                | No concerns       | Low risk       | No concerns  | Major concerns | No concerns   | No concerns | Low               |
| Gabapentin800 vs Pregabalin300  | --                | No concerns       | Low risk       | No concerns  | Major concerns | No concerns   | No concerns | Low               |
| Gabapentin800 vs Pregabalin75   | --                | No concerns       | Low risk       | No concerns  | Major concerns | No concerns   | No concerns | Low               |
| Gabapentin900 vs Pregabalin150  | --                | Some concerns     | Low risk       | No concerns  | Major concerns | No concerns   | No concerns | Very low          |
| Gabapentin900 vs Pregabalin300  | --                | Some concerns     | Low risk       | No concerns  | Major concerns | No concerns   | No concerns | Very low          |
| Gabapentin900 vs Pregabalin75   | --                | Some concerns     | Low risk       | No concerns  | Major concerns | No concerns   | No concerns | Very low          |
| Pregabalin150 vs Pregabalin300  | --                | Some concerns     | Low risk       | No concerns  | Major concerns | No concerns   | No concerns | Very low          |
| Pregabalin300 vs Pregabalin75   | --                | No concerns       | Low risk       | No concerns  | Major concerns | No concerns   | No concerns | Low               |

**eTable 7. SUCRA, PrBest, and Mean Rank of Different Dosages of Gabapentin and Pregabalin for Patients Undergoing Spinal Surgery.**

| Treatment<br>(Nausea without funding) | SUCRA | PrBest | MeanRank |
|---------------------------------------|-------|--------|----------|
| Pregabalin300mg                       | 78.4  | 24.3   | 2.7      |
| Pregabalin150mg                       | 76.6  | 31.4   | 2.9      |
| Gabapentin300mg                       | 64.6  | 18.3   | 3.8      |
| Gabapentin900mg                       | 52.7  | 12.9   | 4.8      |
| Gabapentin800mg                       | 45.2  | 9.9    | 5.4      |
| Placebo                               | 41.6  | 0.0    | 5.7      |
| Gabapentin600mg                       | 38.5  | 2.3    | 5.9      |
| Gabapentin1200mg                      | 38.0  | 0.9    | 6.0      |
| Pregabalin75mg                        | 14.5  | 0.0    | 7.8      |

**eTable 8: Assessment of Inconsistency With Design-by-Treatment Interaction Models**

|     | Chi-Square | P value for test of<br>global inconsistency |
|-----|------------|---------------------------------------------|
| VAS | 7.53       | 0.8728                                      |

## eReferences

1. Myles, P. S. et al. Measuring acute postoperative pain using the visual analog scale: the minimal clinically important difference and patient acceptable symptom state. *Br. J. Anaesth.* **118**, 424–429 (2017).
2. Papakonstantinou, T., Nikolakopoulou, A., Higgins, J. P. T., Egger, M. & Salanti, G. CINeMA: Software for semiautomated assessment of the confidence in the results of network meta-analysis. *Campbell Syst. Rev.* **16**, (2020).
