# Supplementary material for: Different Gabapentin and Pregabalin Dosages for Perioperative Pain Control in Patients Undergoing Spine Surgery: A Systematic Review and Network Meta-Analysis
Source: PubMed Central journal article supplement (PMC10413173; doi:10.1001/jamanetworkopen.2023.28121), 2023-08-09
Supplement: jamanetwopen-e2328121-s002.pdf [file jamanetwopen-e2328121-s002.pdf]

## Data Sharing Statement

Tsai. Different Gabapentin and Pregabalin Dosages for Perioperative Pain Control in Patients Undergoing Spine Surgery. *JAMA Netw Open*. Published August 09, 2023.  
doi:10.1001/jamanetworkopen.2023.28121

### Data

**Data available:** No
